# Supplementary material
Source: publisher figshare collection journal article supplement (https://gsapubs.figshare.com/ndownloader/files/30963685)
Supplement: Supplementary file 1 [file 30963685]

## Sheet: Red beds
Stratigraphic unit/succession	Location	Maximum age (Ma)	± 2σ (Ma)	Minimum age (Ma)	± 2σ (Ma)	References
FA Formation, Franceville Basin	Gabon	2703	41	2191	13	Sawaki et al., 2017; Ossa Ossa et al., 2020; Horie et al., 2005; Bankole et al., 2016
Indicator Formation, Peribonca Formation, Otish Group	Canada	2515	3	2169	1.4	Hamilton and Buchan, 2016; Hamilton, 2009 (MERN report); Chandler, 1980; Schidlowski et al., 1983; Martin et al., 2013; Kouassi, 1979 (Ph.D Thesis)
Lorrain Formation, Bar River Formation, Cobalt Group	Canada	2452.5	6.2	2308	8	Roscoe, 1969; Philippot et al., 2018; Ketchum et al., 2013
Koegas Subgroup	South Africa	2436	6	2426	3	Schröder et al., 2011; Gumsley et al., 2017; Schier et al., 2018; Ngobeli, 2019 (M.Sc thesis)
Hekpoort basalt, Timeball Hill Formation, Pretoria Group	South Africa	2316	7	2184	76	Cornell et al., 2016; Lenhardt et al., 2020; Hannah et al., 2004; Yang and Holland, 2003; Coetzee et al., 2006; Rasmussen et al., 2013; Humbert et al., 2018
Kona Dolomite, Chocolay Group	USA	2288	15	2207	5	Bekker et al., 2006; Vallini et al., 2006
Chakonipau Formation, Seward Group	Canada	2241	18	2169	4	Bekker et al., 2009 (AGU abstract); Rohon et al., 1993; Chandler, 1980
Lace Lake Formation, Alder Formation, Pistolet Group	Canada	2241	18	2142	4	Bekker et al., 2009 (AGU abstract); T. Krogh, cited in Clark, 1984; Chandler, 1980; Rohon et al., 1993
Ruth Formation, Ferriman Group	Canada	2241	18	1884	1.6	Bekker et al., 2009 (AGU abstract); Findlay et al., 1995; Chandler, 1980
Lieryu Formation, Liaohe Group	China	2204	11	2158	23	Li and Chen, 2014; Peng and Palmer, 2002; Luo et al., 2008
Gulcheru Fm, Pupughni Group	India	2176	3.7	1930	12	Anand et al., 2003; French and Heaman, 2010; Basu et al., 2014; Rai et al., 2015; Sai et al., 2016
Tulomozero Formation, Jatulian Assemblages	Russia	2090	70	1956	5	Puchtel et al., 1998; Ovchinnikova et al., 2007; Melezhik et al., 2005; Blattler et al., 2018
Waterberg Group	South Africa	2054	4	1873.7	0.8	Hanson et al., 2004; Dorland et al., 2006; Eriksson and Vos, 1979; Eriksson et al., 2000; Andersen et al., 2019
"Red and green mudstone unit," Union Island Group	Canada	2026	19	1986.4	2.4	Sheen et al., 2018; Bostock et al., 1987 (Geological Survey of Canada Report); Hoffman et al., 1977
Kasegalik Formation, Belcher Group	Canada	2018.5	1	2015.4	1.8	Hodgskiss et al., 2019; Hodgskiss et al., 2020
Akaitcho River Formation, Sosan Group	Canada	1963	6	1882.5	0.95	Bowring and Grotzinger, 1992; Hoffman et al., 2011; Chandler, 1980; Davis and Bleeker, 2007
Nonacho Group	Canada	1921	75	1827	4	Neil et al., 2021; Bostock and van Breeman, 1992 (Geological Survey of Canada Report); Chandler, 1980
Stark Formation, Portage Inlet Formation, Christie Bay Group	Canada	1882.5	0.95	1865	15	Hoffman et al., 2011; Bowring et al., 1984; Badham and Stanworth, 1977; Pope and Grotzinger, 2003; Van Breemen et al., 2013
McLeod Bay Formation, Gibraltar Formation, Kahochella Group	Canada	1882.5	0.95	1865	15	Hoffman et al., 2011; Bowring et al., 1984; Badham and Stanworth, 1977; Chandler, 1980; Davis and Bleeker, 2007; Mitchell et al., 2010
Clachtoll Formation, Bay of Stoer Formation, Stoer Group	Scotland	1866	0	944	39	Rainbird et al., 2001; Turnbull et al., 1996; Parnell et al., 2010; Parnell et al., 2011
Missi Group	Canada	1848	4	1837	4	Machado et al., 2000; Stauffer, 1974; Chandler, 1980; Zwanzig, 2000
South Channel Formation, Kazan Formation, Baker Lake Group	Canada	1833	3	1785	3	Rainbird et al., 2006; Chandler, 1980; Rainbird et al., 2003; Hadlari et al., 2006
Wyllies Poort Formation, Soutpansberg Group	South Africa	1832	9	1604	33	Mapeo et al., 2004; Geng et al., 2014; Cornell et al., 2016
Cangalongue Formation, Chela Group	Namibia/Angola	1810	11	1761	19	Pedreira and Waele, 2008; Pereira et al., 2011; Salminen et al., 2018
Majiahe Formation, Xiong'er Group	China	1789	3.5	1778	6.5	Cui et al., 2011; He et al., 2009; Cui et al., 2010; Dazhong et al., 1990; Zhang et al., 2012
Yinmin Formation, Dongchuan Group	China	1780	0	1690	32	Zhao et al., 2010
Hornby Bay Group	Canada	1740	5	1592	3	Irving et al., 2004; Buchan and Hamilton, 2010; Chandler, 1980
Satakunta Sandstone	Finland	1571	3	1264	12	Suominen, 1991; Kohonen et al., 1993; Klein et al., 2014
Pandurra Formation, Blue Range Beds, Gawler Craton	Australia	1562	30	1424	51	Fanning et al., 1988; Rollison, 2016 (PhD thesis); Schmidt and Williams, 2011
Yangzhuang Formation, Jixian Group	China	1560	5	1437	21	Su et al., 2010; Zhang et al., 2012; Guo et al., 2019
Pass Lake Formation, Rossport Formation, Sibley Group	Canada	1537	10	1339	33	Davis and Sutcliffe, 1985; Franklin et al., 1980; Cheadle, 1986; Rogala et al., 2007
Corcoran Formation, Roper Group	Australia	1492	4	1417	29	Kendall et al., 2009; Jackson et al., 1999; Abbott and Sweet, 2000
Appekunny Formation, Lower Belt	Canada/USA	1469	2.5	1457	2	Sears et al., 1998; Chandler, 1980; Evans et al., 2000
Grinnell Formation, Ravalli Group	Canada/USA	1469	2.5	1454	9	Sears et al., 1998; Evans et al., 2000; Chandler, 1980
Helena Formation, Wallace Formation, Siyeh Formation, Piegan Group	Canada/USA	1457	2	1443	7	Sears et al., 1998; Evans et al., 2000; Chandler, 1980
Apache Group	USA	1328	5	1100	15	Silver, 1978; Stewart et al., 2001; Parnell et al., 2018
Whisky Lake Formation, Upper Red Quartzite Formation, Seal Lake Group	Canada	1273	1	1224	6	Romer et al., 1995; Cadman et al., 1993
Adams Sound Formation, Eqalulik Group	Canada	1267	2	1048	12	Gibson et al., 2018; LeCheminant and Heaman, 1989; Jackson and Ianelli, 1988; Long and Turner, 2012
Narssârssuk Formation, Thule Group	Greenland	1267	2	720	8	LeCheminant and Heaman, 1989; Pehrsson and Buchan, 1999; Dawes, 1997; Samuelsson et al., 1999
Mapidi-east formation, Kalahari Mangenese Field	South Africa	1245	20	1245	20	Rasmussen et al., 2020
Aubures Formation, Ganaams Group	Namibia	1108	9	547.32	0.65	Kasbohm et al., 2016
Sturgeon Falls paleosol, Powder Mill Group	USA	1107.9	1.8	1060	20	Davis and Green, 1997; Bornhorst et al., 1988; Cannon et al., 1993; Mitchell and Sheldon, 2010
Ngwako Pan Formation, Mamuno Formation, Ghanzi Group	Botswana	1106	2	821	43	Schwartz et al., 1996; Key and Rundle, 1981; Modie, 2000; Modie, 1996
Copper Harbour Conglomerate, Freda Sandstone, Oronto Group	Canada and USA	1087.2	1.6	959	19	Davis and Paces, 1990; Malone et al., 2016; Cumming et al., 2013
Strathcona Sound Formation, Nunatsiaq Group	Canada	1046	16	720	8	Gibson et al., 2018; Pehrsson and Buchan, 1999; Jackson and Ianelli, 1988
Mutoshi Formation, Fungurume Group	Zambia	883	10	573	5	Armstrong et al., 2005; Master et al., 2005; Wendorff, 2005; Wendorff, 2011
Kilian Formation, Holman Group	Canada	761	41	723	4	van Acken et al., 2013; Heaman et al., 1992; Jones et al., 2010; Rayner and Rainbird, 2013; Rainbird et al., 2020
Lower Mount Harper Group	Canada	752.7	5.5	717.43	0.1	Rooney et al., 2015; Strauss et al., 2014; Macdonald et al., 2010
Sayunei Formation, Rapitan Group	Canada	716.9	0.4	662.4	3.9	Macdonald et al., 2018; Rooney et al., 2014; Chandler, 1980; Baldwin et al., 2016
Angepena Formation. Umberatana Group	Australia	663.03	0.11	635.5	1.2	Cox et al., 2018; Fromhold and Wallace, 2011; Wallace et al., 2015
Crown Hill Formation, Musgravetown Group	Canada	591.3	1.6	541	1	Mills et al., 2017 (Geological Survey of Newfoundland and Labrador Report); O'Brien and King, 2002

## Sheet: RSDM
Stratigraphic unit/succession	Location	Redox-sensitive detrital minerals	Maximum age (Ma)	± 2σ (Ma)	Minimum age (Ma)	± 2σ (Ma)	References
Jacobina Group	Brazil	Pyrite, uraninite	3313	68	1918	18	Ledru et al., 1997; Figueiredo, 1989; Teles et al., 2015
Lalla Rookh Formation, Croydon Group	Australia	Pyrite, siderite	3304	6	2941	9	Van Kranendonk et al., 2007; Nelson et al., 2000; Van Kranendonk et al., 2002; Rasmussen and Buick, 1999
Dominion Reef, Rhenosterspruit Formation, Dominion Group	South Africa	Pyrite, uraninite	3174	9	3062	5	Frimmel et al., 2009; Robb et al., 1992; Agangi et al., 2020; Hofmann et al., 2009; Simpson and Bowles, 1977; Hiemstra, 1968
Bababudan Group	India	Pyrite, uraninite	3132	6	2676	20	Hokada et al., 2013; Srinivasan and Ojakangas, 1986; Janardhan and Basavalingu, 1988
Coronation Formation, Government Subgroup, West Rand Group	South Africa	Pyrite	2985	14	2914	8	Armstrong et al., 1991; Kositcin and Krapež, 2004; Guy et al., 2010
Mozaan Contact Reef, Mozaan Group	South Africa	Pyrite	2985	1	2837	5	Hegner et al., 1994; Gutzmer et al., 1999; Hofmann et al., 2009; Orbeger et al., 2011
Bonanza Formation, Hospital Hill Subgroup, West Rand Group	South Africa	Pyrite, uraninite	2985	14	2914	8	Kositcin and Krapež, 2004; Armstrong et al., 1991; Frimmel et al., 2018
Mosquito Creek Formation, Nullagine Group	Australia	Pyrite, uraninite	2971	15	2905	9	Thorpe et al., 1992; Bagas et al., 2008; Rasmussen and Buick, 1999
Reitkuil Formation, Maraisburg Formation, Jeppestown Subgroup, West Rand Group	South Africa	Pyrite	2931	8	2837	5	Kositcin and Krapež, 2004; Gutzmer et al., 1999; Cairncross and Brink, 1990; Guy et al., 2012
Mahagiri Quartzite, Iron Ore Group	India	Pyrite, uraninite	2909	7	2836	67	Sreenivas et al., 2019; Bandyopadhyay et al., 2001; Mukhopadhyay et al., 2016
Basal Reef, Johannesburg Subgroup, Central Rand Group	South Africa	Pyrite	2902	13	2837	5	Kositcin and Krapež, 2004; Gutzmer et al., 1999; Minter et al., 1993
Vaal Reef, Turffontein Subgroup, Central Rand Group	South Africa	Pyrite, uraninite	2872	6	2714	8	Armstrong et al., 1991; Kositcin and Krapež, 2004; Frimmel, 2005; England et al., 2002; Hofmann et al., 2009; Burron et al., 2018
Fortescue Group	Australia	Pyrite, uraninite, siderite	2851	2	2718	3	Nelson, 1998; Blake et al., 2004; Rasmussen and Buick, 1999
Ventersport Formation, Klipriviersberg Group	South Africa	Pyrite, uraninite	2787	2	2733.4	3.4	de Kock et al., 2012; Gumsley et al., 2020; Krapez, 1985; Hofmann et al., 2009; Altermann and Lenhardt, 2012
Black Reef Quartzite Formation	South Africa	Pyrite, uraninite	2709	4	2588	7	Armstrong et al., 1991; Martin et al., 1998; Barton and Hallbauer, 1996; England et al., 2002; Walraven and Martini, 1995; Gauert et al., 2011; Nwaila et al., 2019
Cheshire Formation, Ngezi Group	Zimbabwe	Pyrite	2692	9	2634	17	Arndt et al., 1993 (in Bickle et al.); Horstwood et al., 1998; Hofmann et al., 2001; 2009
Moeda Formation, Caraça Group	Brazil	Pyrite, uraninite	2677	13	2655	6	Cabral et al., 2012; Villaca and Moura, 1981; Minter et al., 1990; Hartmann et al., 2006; Guimarães et al., 2019
Livingstone Creek and Matinenda formations, Elliot Lake Group	Canada	Pyrite, uraninite	2452.5	6.2	2308	8	Rasmussen et al., 2013; Ketchum et al., 2013; Pienaar, 1963; Roscoe, 1969; Robinson and Spooner, 1982; Krogh et al., 1984; Prasad and Roscoe, 1996; Long et al., 2011; Philippot et al., 2018
Mississagi Formation, Hough Lake Group	Canada	Pyrite, uraninite	2452.5	6.2	2308	8	Rasmussen et al., 2013; Ketchum et al., 2013; Pienaar, 1963; Roscoe, 1969; Robinson and Spooner, 1982; Krogh et al., 1984; Prasad and Roscoe, 1996; Long et al., 2011; Philippot et al., 2018
Rock Mountain Conglomerate, Bow Quartzite, Jack Hills Quartzite, and Bridger Peak Quartzite; Phantom Lake Metamorphic Suite; Magnolia Formation, Lindsey Quartzite	USA	Pyrite, uraninite	2451	12	2092	9	Houston et al., 1992 (USGS Professional Paper); Premo and van Schmus, 1989; Bekker et al., 2003
Naragas and Heynskop formations, Koegas Subgroup	South Africa	Pyrite, uraninite	2436	6	2426	3	Schier et al., 2018; Gumsley et al., 2017; Johnson et al., 2013; Johnson et al., 2014

## Sheet: MIF-S
Stratigraphic unit/succession	Location	Maximum age (Ma)	± 2σ (Ma)	Minimum age (Ma)	± 2σ (Ma)	References
Akilia Association	Greenland	3890	---	3660	---	Nutman et al., 2013; Cates and Mojzsis, 2006
Onverwacht Group	South Africa	3544	3	3258	3	Kröner et al. 1996; Byerly et al. 1996; Roerdink et al. 2012; Grosch et al., 2011; Diergaardt, 2013 (M.Sc thesis); Marin-Carbonne et al., 2020
Warrawoona Group	Australia	3481	3.5	3430	4	McNaughton et al., 1993; Van Kranendonk et al., 2008; Farquhar et al. 2000; Glikson et al., 2016; Retallack, 2018
Strelley Pool Chert	Australia	3414	34	3350	3	Gardiner et al., 2019; Nelson, 2005; Hickmann, 2008; Bontognali et al. 2012
Sargur Group	India	3352	110	3352	110	Jayananda et al., 2008; Mishima et al. 2017
Fig Tree Group	South Africa	3277	5	3256	1	Heinrichs, 1980; Kröner et al., 1991; Byerly et al., 1996; Drabon et al., 2019; Bao et al. 2007; Kohler and Anhaeusser, 2002; Busigny et al., 2017; Marin-Carbonne et al., 2020
Sulphur Springs Group	Australia	3255	3	3235	3	Buick et al., 2002; Golding et al. 2011
Moodies Group	South Africa	3223	1	3219	9	De Ronde and Kamo, 2000; Heubeck et al., 2013; Farquhar et al. 2007; Saitoh et al., 2020
Cleaverville Group	Australia	3195	14	3015	5	Kiyokawa et al., 2002; Nelson, 1997; Kiyokawa et al., 2019; Mojzsis et al. 2003; Kiyokawa et al., 2018
Nsuze Group	South Africa	3161	14	2968	8	Wilson and Zeh, 2018; Mukasa et al., 2013; Domagal-Goldman et al. 2008
Dominion Group	South Africa	3086	3	3074	6	Armstrong et al., 1991; Robb and Meyer, 1995; Hofmann et al. 2009; Agangi et al., 2020
Mozaan Group	South Africa	2986	13	2837	5	Wilson and Zeh, 2018; Gutzmer et al., 1999; Ono et al. 2006
Government Subgroup, West Rand Group	South Africa	2985	14	2914	8	Armstrong et al., 1991; Kositcin and Krapež, 2004; Guy et al. 2012
Hospital Hill Subgroup, West Rand Group	South Africa	2985	14	2914	8	Armstrong et al., 1991; Kositcin and Krapež, 2004; Guy et al. 2012
Nullagine Group	Australia	2972	14	2905	9	Thorpe et al., 1992; Bagas et al., 2008; Ohmoto et al. 2006; Bagas et al., 2005
Jeppestown Subgroup, West Rand Group	South Africa	2931	8	2837	5	Guy et al., 2010; Gutzmer et al., 1999; Farquhar et al. 2007; Guy et al., 2012
Chitradurga Group	India	2919	6	2368.6	1.3	Jayananda et al., 2013; Raju and Mazumder, 2020; Mishima et al. 2017
Bababudan Group	India	2911	49	2720	7	Raju and Mazumder, 2020; Kumar et al., 1996; Trendall et al., 1997; Mishima et al. 2017
Johannesburg Subgroup, Central Rand Group	South Africa	2902	13	2837	5	Kositcin and Krapež, 2004; Gutzmer et al., 1999; Hofmann et al. 2009; Guy et al., 2012
Turffontein Subgroup, Central Rand Group	South Africa	2872	6	2837	5	Kositcin and Krapež, 2004; Gutzmer et al., 1999; Guy et al. 2014; Guy et al., 2012
Bulawayan Group	Zimbabwe	2866	7	2643	8	Prendergast and Wingate, 2013; Wilson et al., 1995; Domagal-Goldman et al. 2008; Prendergast, 2004
Fortescue Group	Australia	2851	2	2629	5	Nelson, 1998; Wingate, 1999; Hall, 2005; Farquhar et al. 2007; Bolhar and van Kranendonk, 2007; Trendall et al., 2004; Blake et al., 2004; Rasmussen et al., 2005; Coffey, 2011 (Ph.D Thesis)
Klipriviersberg Group	South Africa	2789	4	2714	16	Gusmley et al., 2020; Armstrong et al., 1991; Farquhar et al. 2000
Ngezi Group	Zimbabwe	2788	87	2543	70	Sawada et al., 2016; Chauvel et al., 1993; Thomazo et al. 2013; Bolhar et al., 2002
Suomussalmi Greenstone Belt (formerly Saarikylä Group)	Finland	2774	8	2774	8	Papunen et al. 2009 (Geological Survey of Finland Bulletin); Konnuanaho et al. 2013; Lehtonen et al., 2017
Grão Pará Group	Brazil	2757	7	2740	8	Trendall et al., 1998; Buhn et al. 2012
Michipicoten Group	Canada	2749	2	2749	2	Turek et al., 1982; Hauri et al. 2016
Deloro Group	Ontario, Canada	2734	2	2724	2	Ayer et al., 2002; Thurston et al., 2008; Hauri et al. 2016; Corfu et al., 1989
Deer Lake Greenstone Belt	USA	2720	3	2695	14	Corfu and Stone, 1998; Yang et al., 2009; Li et al., 2017
Stoughton-Roquemaure Group	Canada	2717	1.1	2707	5	Ayer et al., 2002; Kurzweil et al. 2013; Bleeker et al., 1999
Kambalda Sequence	Australia	2714	5	2685	4	Claoué-Long et al., 1988; Caruso et al. 2017; Kositchin et al., 2008; Fiorentini et al., 2010
Platberg Group	South Africa	2714	8	2709	4	Schneiderhan et al., 2011; Farquhar et al. 2007
Agnew-Wiluna Greenstone Belt	Australia	2712	6	2692	3	Kositcin et al., 2008; Bekker et al. 2009
Abitibi Greenstone Belt	Canada	2710	2	2703	2	Ayer et al., 2002; Hiebert et al. 2018; Corfu et al., 1989
Chuniespoort Group	South Africa	2709	4	2424	12	Armstrong et al., 1991; Martin et al., 1998; Hofmann et al. 2009
Black Flag Group	Australia	2685	4	2672	6	Tripp, 2013 (PhD Thesis); Steadman et al., 2015; Steadman et al., 2013; Godefroy-Rodriguez et al., 2020; McDavitt et al., 2021
Campbellrand Subgroup, Ghaap Group	South Africa	2650	8	2480	6	Gutzmer and Beukes, 1998; Knoll and Beukes, 2009; Ono et al. 2009b; Pickard, 2003; Sumner and Bowring, 1996; Kendall et al., 2010
Schmidtsdrif Subgroup, Ghaap Group	South Africa	2650	8	2555	19	Walraven and Martini, 1995; Altermann and Nelson, 1998; Moore et al., 2012; Guo et al. 2009
Caraça Group	Brazil	2649	11	2655	6	Hartmann et al., 2006; Cabral et al., 2012; Zhelezinskaia et al. 2014
Hamersley Group	Australia	2630	6	2459	3	Rasmussen et al., 2005; Trendall et al., 1998; Ono et al. 2003; Knoll and Beukes, 2009
Anshan Group	China	2574	13	2527	3	Guo et al., 2017; Hou et al. 2007
Imandra/Varzuga Greenstone Belt	Australia	2501.5	1.7	2434	6.6	Amelin et al., 1995; Warke et al., 2020
Pretoria Group	South Africa	2480	6	2224	4	Nelson et al. 1999; Hannah et al. 2004; Schröder et al. 2016; Guo et al., 2009; Poulton et al., 2021
Asbestos Hill Subgroup, Ghaap Group	South Africa	2465	5	2431	31	Pickard et al., 2003; Trendall et al., 1998; Ono et al. 2009b; Caquineau et al., 2018
Elliot Lake Group	Canada	2452.5	6.2	2308	8	Rasmussen et al., 2013; Ketchum et al., 2013; Papineau et al., 2007; Cui et al., 2018
Hough Lake Group	Canada	2452.5	6.2	2308	8	Rasmussen et al., 2013; Ketchum et al., 2013; Papineau et al., 2007; Cui et al., 2018
Quirke Lake Group	Canada	2452.5	6.2	2308	8	Rasmussen et al., 2013; Ketchum et al., 2013; Papineau et al., 2007; Cui et al., 2018
Cobalt Group	Canada	2452.5	6.2	2308	8	Rasmussen et al., 2013; Ketchum et al., 2013; Papineau et al., 2007; Cui et al., 2018
Hamersley Group	Australia	2450	3	2310	7	Trendall et al., 2004; Caquineau et al., 2018
Koegas Subgroup, Ghaap Group	South Africa	2436	6	2426	3	Schier et al., 2018; Gumsley et al., 2017; Johnson et al., 2013; Johnson et al., 2014
Crixás Group	Brazil	2209	28	2170	17	Tassinari et al. 2006; Jost et al. 2010; Bühn et al., 2012

## Sheet: Non-zero I|(Ca+Mg)
Stratigraphic unit/succession	Location	Maximum age (Ma)	± 2σ (Ma)	Minimum age (Ma)	± 2σ (Ma)	References
Lower Albanel Formation, Mistassini Group	Canada	2515	3	1826	15	Hamilton, 2009 (Ministère de Ressources Naturelles, Québec Report); Bekker et al. 2012 GAC-MAC Abstract; Hardisty et al., 2014
Tongwane Formation, Chuniespoort Group	South Africa	2480	6	2424	12	Nelson et al. 1999; Schröder et al. 2016; Hardisty et al., 2014
Águas Claras Fm, Serra Pelada Sequence	Brazil	2373	4	1880	2	Justo et al., 2018; Machado et al., 1991; Hardisty et al., 2014; Araújo et al., 2021
Turee Creek Group	Australia	2310	7	2209	15	Martin et al. 1998; Caquineau et al. 2018; Hardisty et al., 2014
Gordon Lake Formation, Cobalt Group	Canada	2308	8	2217	1.6	Andrews et al. 1986; Rasmussen et al., 2013; Hardisty et al., 2014
Wooly Dolomite, Duck Creek Formation, Wyloo Group	Australia	2031	6	1795	7	Müller et al. 2005; Hardisty et al., 2017; Evans et al. 2003; Wilson et al. 2010
Basler Lake, Snare Group	Canada	2014.32	0.89	1882.5	0.95	Hoffman et al., 2011; Buchan et al., 2009; Hardisty et al., 2017
Lucknow Fm, Olifantshoek Group	South Africa	1966	15	1915	1.4	Da Silva, 2011 (M.Sc thesis); Cornell et al. 2016; Beukes et al. 2019; Hardisty et al., 2014
Taltheilei Formation, Pethei Group	Canada	1882.5	0.95	1865	15	Bowring et al., 1984; Hoffman et al., 2011; Hardisty et al., 2017
Paradise Creek Formation, McNamara Group	Australia	1678	2	1595	6	Page et al., 2000; Hardisty et al., 2017
Gaoyuzhuang Formation, Tieling Formation, Jixian Group	China	1625.3	6.2	1366	9	Lu and Li, 1991; Gao et al., 2008; Shang et al., 2019; Wei et al., 2021; Li et al., 2014; Zhang et al., 2015; Hardisty et al., 2017
Helena Formation, Piegan Group	USA	1457	2	1443	7	Sears et al., 1998; Evans et al., 2000; Hardisty et al., 2017
Greenhorn Lakes Formation, Kendall River Formation, Sulky Formation, Dismal Lakes Group	Canada	1438	8	1269	1	Mackie et al., 2009; Hardisty et al., 2017
Xiamaling Formation	China	1437	21	1327	2	Liu et al., 2011; Su et al., 2010; Liu et al., 2020
Mescal Formation, Apache Group	USA	1328	5	1100	15	Silver, 1978; Stewart et al., 2001; Hardisty et al., 2017
Society Cliffs Formation (now Angmaat/Nanisivik formations), Victor Bay Formation, Uluksan Group	Canada	1267	2	720	8	LeCheminant and Heaman, 1989; Pehrsson and Buchan, 1999; Hardisty et al., 2017
Atar Group	Mauritania	1109	22	775	54	Clauer, 1981; Rooney et al., 2010; Hardisty et al., 2017
Burovaya Formation, Sukhaya Tunguska Formation, Turukhansk Uplift	Russia	1035	60	850	50	Ovchinnikova et al., 1995; Nozhkin et al., 1999; Hardisty et al., 2017
Draken Formation, Grusdievbreen Formation, Svanbergfjellet Formation, Akademikerbreen Group	Svalbard/Norway	937	9	716.5	0.24	Johansson et al., 2000; Macdonald et al., 2010; Hardisty et al., 2017; Wörndle et al., 2019
Oxfordbreen Formation, Veteranen Group	Svalbard/Norway	937	9	716.5	0.24	Johansson et al., 2000; Macdonald et al., 2010; Hardisty et al., 2017; Wörndle et al., 2019
Wynniat Formation, Minto Inlet Formation, unnamed group within Shaler Supergroup	Canada	892	13	723	4	Heaman et al., 1992; van Acken et al., 2013; Hardisty et al., 2017
Beck Springs, Pahrump Group	USA	787	11	717.7	0.1	Mahon et al., 2014; Macdonald et al., 2010; Hardisty et al., 2017
Johnnie Dolomite	USA	635.5	1.1	541	1	Rooney et al., 2015; Witkosky and Wernicke, 2018; Hardisty et al., 2017
Duoshantuo Formation	China	635.2	0.6	557	3	Condon et al., 2005; Zhou et al., 2018; Hardisty et al., 2017
Khufai Formation, Nafun Group	Oman	578.2	5.9	562.7	3.8	Rooney et al., 2020; Hardisty et al., 2017

## Sheet: References
Abbott, S.T. and Sweet, I.P., 2000. Tectonic control on third‐order sequences in a siliciclastic ramp‐style basin: An example from the Roper Superbasin (Mesoproterozoic), northern Australia. Australian Journal of Earth Sciences, 47(3), pp.637-657.
Agangi, A., Hofmann, A., Hegner, E., Xie, H., Teschner, C., Slabunov, A. and Svetov, S.A., 2020. The Mesoarchaean Dominion Group and the onset of intracontinental volcanism on the Kaapvaal craton–geological, geochemical and temporal constraints. Gondwana Research, 84, pp.131-150.
Altermann, W. and Lenhardt, N., 2012. The volcano-sedimentary succession of the Archean Sodium Group, Ventersdorp Supergroup, South Africa: volcanology, sedimentology and geochemistry. Precambrian Research, 214, pp.60-81.
Altermann, W. and Nelson, D.R., 1998. Sedimentation rates, basin analysis and regional correlations of three Neoarchaean and Palaeoproterozoic sub-basins of the Kaapvaal craton as inferred from precise U–Pb zircon ages from volcaniclastic sediments. Sedimentary Geology, 120(1-4), pp.225-256.
Amelin, Y.V., Heaman, L.M. and Semenov, V.S., 1995. U-Pb geochronology of layered mafic intrusions in the eastern Baltic Shield: implications for the timing and duration of Paleoproterozoic continental rifting. Precambrian Research, 75(1-2), pp.31-46.
Anand, M., Gibson, S.A., Subbarao, K.V., Kelley, S.P. and Dickin, A.P., 2003. Early Proterozoic melt generation processes beneath the intra-cratonic Cuddapah Basin, southern India. Journal of Petrology, 44(12), pp.2139-2171.
Andersen, T., Elburg, M.A. and Van Niekerk, H.S., 2019. Detrital zircon in sandstones from the Palaeoproterozoic Waterberg and Nylstroom basins, South Africa: Provenance and recycling. South African Journal of Geology 2019, 122(1), pp.79-96.
Andrews, A.J., Masliwec, A., Morris, W.A., Owsiacki, L. and York, D., 1986. The silver deposits at Cobalt and Gowganda, Ontario. II: An experiment in age determinations employing radiometric and paleomagnetic measurements. Canadian Journal of Earth Sciences, 23(10), pp.1507-1518.
Araújo, R., Araújo Filho, R. and Costa, L., 2021. Tectono-sedimentary evolution of the Paleoproterozoic succession of the Carajás Basin, southeastern Amazonian Craton, Brazil: Insights from sedimentology, stratigraphy, and U–Pb detrital zircon geochronology. Precambrian Research, 362, p.106290.
Armstrong, R.A., Compston, W., Retief, E.A., Williams, I.T. and Welke, H.J., 1991. Zircon ion microprobe studies bearing on the age and evolution of the Witwatersrand triad. Precambrian Research, 53(3-4), pp.243-266.
Armstrong, R.A., Master, S. and Robb, L.J., 2005. Geochronology of the Nchanga Granite, and constraints on the maximum age of the Katanga Supergroup, Zambian Copperbelt. Journal of African Earth Sciences, 42(1-5), pp.32-40.
Arndt, N. T., Orpen, J. L., Nisbet, E. G., Martin, A., Keays, R. R., & Renner, R., 1993. Geochemistry of the igneous rocks of the Belingwe Greenstone Belt. Alteration, contamination and source chemistry. In: Bickle, M.J., & Nisbet, E. G. (eds.) The Development of the Belingwe Greenstone Belt. A Study of the Construction of the Continental Crust. Geol. Soc. Zimbabwe Spec. Publ. 2, 323 pp
Ayer, J., Amelin, Y., Corfu, F., Kamo, S., Ketchum, J., Kwok, K. and Trowell, N., 2002. Evolution of the southern Abitibi greenstone belt based on U–Pb geochronology: autochthonous volcanic construction followed by plutonism, regional deformation and sedimentation. Precambrian Research, 115(1-4), pp.63-95.
Badham, J.P.N. and Stanworth, C.W., 1977. Evaporites from the Lower Proterozoic of the east arm, Great Slave Lake. Nature, 268(5620), pp.516-518.
Bagas, L., Bierlein, F.P., Bodorkos, S. and Nelson, D.R., 2008. Tectonic setting, evolution and orogenic gold potential of the late Mesoarchaean Mosquito Creek basin, North Pilbara craton, Western Australia. Precambrian Research, 160(3-4), pp.227-244.
Bagas, L., Farrell, T.R. and Nelson, D.R., 2005. The age and provenance of the Mosquito Creek Formation. Western Australia Geological Survey, pp.2003-2004.
Baldwin, G.J., Turner, E.C. and Kamber, B.S., 2016. Tectonic controls on distribution and stratigraphy of the Cryogenian Rapitan iron formation, northwestern Canada. Precambrian Research, 278, pp.303-322.
Bandyopadhyay, P.K., Chakrabarti, A.K., Deomurari, M.P. and Misra, S., 2001. 2.8 Ga old anorogenic granite-acid volcanics association from western margin of the Singhbhum-Orissa Craton, eastern India. Gondwana Research, 4(3), pp.465-475.
Bankole, O.M., El Albani, A., Meunier, A., Rouxel, O.J., Gauthier-Lafaye, F. and Bekker, A., 2016. Origin of red beds in the Paleoproterozoic Franceville Basin, Gabon, and implications for sandstone-hosted uranium mineralization. American journal of science, 316(9), pp.839-872.
Bao, H., Rumble III, D. and Lowe, D.R., 2007. The five stable isotope compositions of Fig Tree barites: Implications on sulfur cycle in ca. 3.2 Ga oceans. Geochimica et Cosmochimica Acta, 71(20), pp.4868-4879.
Barton, E.S. and Hallbauer, D.K., 1996. Trace-element and U-Pb isotope compositions of pyrite types in the Proterozoic Black Reef, Transvaal Sequence, South Africa: Implications on genesis and age. Chemical Geology, 133(1-4), pp.173-199.
Basu, H., Sastry, R.S., Achar, K.K., Umamaheswar, K. and Parihar, P.S., 2014. Palaeoproterozoic fluvio-aeolian deposits from the lower Gulcheru Formation, Cuddapah Basin, India. Precambrian Research, 246, pp.321-333.
Bekker, A. and Eriksson, K.A., 2003. A Paleoproterozoic drowned carbonate platform on the southeastern margin of the Wyoming Craton: a record of the Kenorland breakup. Precambrian Research, 120(3-4), pp.327-364.
Bekker, A., Barley, M.E., Fiorentini, M.L., Rouxel, O.J., Rumble, D. and Beresford, S.W., 2009. Atmospheric sulfur in Archean komatiite-hosted nickel deposits. Science, 326(5956), pp.1086-1089.
Bekker, A., Davis, D. and Wing, B., 2009, May. Chemostratigraphy and geochronology of the Kaniapiskau Supergroup, Labrador Trough indicate a major tectonic reorganization event hidden in the first cycle. In AGU Spring Meeting Abstracts (Vol. 2009, pp. U21D-09).
Bekker, A., Karhu, J.A. and Kaufman, A.J., 2006. Carbon isotope record for the onset of the Lomagundi carbon isotope excursion in the Great Lakes area, North America. Precambrian Research, 148(1-2), pp.145-180.
Bekker, A., Karhu, J.A., Eriksson, K.A. and Kaufman, A.J., 2003. Chemostratigraphy of Paleoproterozoic carbonate successions of the Wyoming Craton: tectonic forcing of biogeochemical change?. Precambrian Research, 120(3-4), pp.279-325.
Bekker, A., Rainbird, R., and Creaser, R.A., 2012. Re-Os isochron age of carbonaceous shales in the upper Mistassini Basin, Quebec, supports correlation of Paleoproterozoic basins around the margins of the Superior Craton. GAC-MAC Abstract.
Beukes, N.J., De Kock, M.O., Vorster, C., Ravhura, L.G., Frei, D., Gumsley, A.P. and Harris, C., 2019. The age and country rock provenance of the Molopo Farms Complex: implications for Transvaal Supergroup correlation in southern Africa. South African Journal of Geology 2019, 122(1), pp.39-56.
Blake, T.S., Buick, R., Brown, S.J.A. and Barley, M.E., 2004. Geochronology of a Late Archaean flood basalt province in the Pilbara Craton, Australia: constraints on basin evolution, volcanic and sedimentary accumulation, and continental drift rates. Precambrian Research, 133(3-4), pp.143-173.
Blättler, C.L., Claire, M.W., Prave, A.R., Kirsimäe, K., Higgins, J.A., Medvedev, P.V., Romashkin, A.E., Rychanchik, D.V., Zerkle, A.L., Paiste, K. and Kreitsmann, T., 2018. Two-billion-year-old evaporites capture Earth’s great oxidation. Science, 360(6386), pp.320-323.
Bleeker, W., 1999. Structure, stratigraphy, and primary setting of the Kidd Creek volcanogenic massive sulfide deposit: A semiquantitative reconstruction. Economic Geology Monograph, 10, pp.71-122.
Bolhar, R. and Van Kranendonk, M.J., 2007. A non-marine depositional setting for the northern Fortescue Group, Pilbara Craton, inferred from trace element geochemistry of stromatolitic carbonates. Precambrian Research, 155(3-4), pp.229-250.
Bolhar, R., Hofmann, A., Woodhead, J., Hergt, J. and Dirks, P.H.G.M., 2002. Pb-and Nd-isotope systematics of stromatolitic limestones from the 2.7 Ga Ngezi Group of the Belingwe Greenstone Belt: constraints on timing of deposition and provenance. Precambrian Research, 114(3-4), pp.277-294.
Bontognali, T.R., Sessions, A.L., Allwood, A.C., Fischer, W.W., Grotzinger, J.P., Summons, R.E. and Eiler, J.M., 2012. Sulfur isotopes of organic matter preserved in 3.45-billion-year-old stromatolites reveal microbial metabolism. Proceedings of the National Academy of Sciences, 109(38), pp.15146-15151.
Bornhorst, T.J., Paces, J.B., Grant, N.K., Obradovich, J.D. and Huber, N.K., 1988. Age of native copper mineralization, Keweenaw Peninsula, Michigan. Economic Geology, 83(3), pp.619-625.
Bostock, H.H. and Van Breemen, O., 1992. The timing of emplacement, and distribution of the Sparrow diabase dyke swarm, District of Mackenzie, Northwest Territories. PAPERS-GEOLOGICAL SURVEY OF CANADA, pp.49-49.
Bostock, H.H., van Breemen, O., Loveridge, W.D., 1987. Proterozoic geochronology in the Taltson Magmatic Zone, N.W.T., in: Radiogenic age and isotopic studies: Report 1. Geological Survey of Canada Paper 87-2, pp. 73–80.
Bowring, S.A. and Grotzinger, J.P., 1992. Implications of new chronostratigraphy for tectonic evolution of Wopmay Orogen, northwest Canadian Shield. American Journal of Science, 292(1), pp.1-20.
Bowring, S.A., Schmus, W.V. and Hoffman, P.F., 1984. U–Pb zircon ages from Athapuscow aulacogen, east arm of Great Slave Lake, NWT, Canada. Canadian Journal of Earth Sciences, 21(11), pp.1315-1324.
Buchan, K.L., LeCheminant, A.N. and van Breemen, O., 2009. Paleomagnetism and U–Pb geochronology of the Lac de Gras diabase dyke swarm, Slave Province, Canada: implications for relative drift of Slave and Superior provinces in the Paleoproterozoic. Canadian Journal of Earth Sciences, 46(5), pp.361-379.
Bühn, B., Santos, R.V., Dardenne, M.A. and de Oliveira, C.G., 2012. Mass-dependent and mass-independent sulfur isotope fractionation (δ34S and δ33S) from Brazilian Archean and Proterozoic sulfide deposits by laser ablation multi-collector ICP-MS. Chemical Geology, 312, pp.163-176.
Buick, R., Brauhart, C.W., Morant, P., Thornett, J.R., Maniw, J.G., Archibald, N.J., Doepel, M.G., Fletcher, I.R., Pickard, A.L., Smith, J.B. and Barley, M.E., 2002. Geochronology and stratigraphic relationships of the Sulphur Springs Group and Strelley Granite: a temporally distinct igneous province in the Archaean Pilbara Craton, Australia. Precambrian Research, 114(1-2), pp.87-120.
Burron, I., da Costa, G., Sharpe, R., Fayek, M., Gauert, C. and Hofmann, A., 2018. 3.2 Ga detrital uraninite in the Witwatersrand Basin, South Africa: Evidence of a reducing Archean atmosphere. Geology, 46(4), pp.295-298.
Busigny, V., Marin-Carbonne, J., Muller, E., Cartigny, P., Rollion-Bard, C., Assayag, N. and Philippot, P., 2017. Iron and sulfur isotope constraints on redox conditions associated with the 3.2 Ga barite deposits of the Mapepe Formation (Barberton Greenstone Belt, South Africa). Geochimica et Cosmochimica Acta, 210, pp.247-266.
Byerly, G.R., Kröner, A., Lowe, D.R., Todt, W. and Walsh, M.M., 1996. Prolonged magmatism and time constraints for sediment deposition in the early Archean Barberton greenstone belt: evidence from the Upper Onverwacht and Fig Tree groups. Precambrian Research, 78(1-3), pp.125-138.
Cabral, A.R., Zeh, A., Koglin, N., Gomes Jr, A.A.S., Viana, D.J. and Lehmann, B., 2012. Dating the Itabira iron formation, Quadrilátero Ferrífero of Minas Gerais, Brazil, at 2.65 Ga: depositional U–Pb age of zircon from a metavolcanic layer. Precambrian Research, 204, pp.40-45.
Cadman, A.C., Heaman, L., Tarney, J., Wardle, R. and Krogh, T.E., 1993. U–Pb geochronology and geochemical variation within two Proterozoic mafic dyke swarms, Labrador. Canadian Journal of Earth Sciences, 30(7), pp.1490-1504.
Cairncross, B. & Brink, M.C., 1990. A reference section for part of the Jeppestown and Government subgroups, Witwatersrand Supergroup, Klerksdorp Goldfield, South Africa. South African journal of geology, 93(1), pp.147-157.
Cannon, W.F., Peterman, Z.E. and Sims, P.K., 1993. Crustal‐scale thrusting and origin of the Montreal River monocline‐A 35‐km‐thick cross section of the midcontinent rift in northern Michigan and Wisconsin. Tectonics, 12(3), pp.728-744.
Caquineau, T., Paquette, J.L. and Philippot, P., 2018. U-Pb detrital zircon geochronology of the Turee Creek Group, Hamersley Basin, Western Australia: timing and correlation of the Paleoproterozoic glaciations. Precambrian Research, 307, pp.34-50.
Caruso, S., Fiorentini, M.L., Moroni, M. and Martin, L.A., 2017. Evidence of magmatic degassing in Archean komatiites: insights from the Wannaway nickel-sulfide deposit, Western Australia. Earth and Planetary Science Letters, 479, pp.252-262.
Cates, N.L. and Mojzsis, S.J., 2006. Chemical and isotopic evidence for widespread Eoarchean metasedimentary enclaves in southern West Greenland. Geochimica et Cosmochimica Acta, 70(16), pp.4229-4257.
Chandler, F.W., 1980. Proterozoic redbed sequences of Canada. Geological Survey of Canada Bulletin 311, 53 pp.
Chauvel, C., Dupre, B., and Arndt, N. T., 1993, Pb and Nd isotopic correlation in Belingwe komatiites and basalts, in, Bickle, M. J., and Nisbet, E. G., eds., The Geology of the Belingwe Greenstone Belt, Zimbabwe: A study of the evolution of Archean continental crust: Balkema, Rotterdam, Geological Society of Zimbabwe Special Publication 2, p. 167–174.
Cheadle, B.A., 1986. Alluvial–playa sedimentation in the lower Keweenawan Sibley Group, Thunder Bay District, Ontario. Canadian Journal of Earth Sciences, 23(4), pp.527-542.
Claoué-Long, J.C., Compston, W. and Cowden, A., 1988. The age of the Kambalda greenstones resolved by ion-microprobe: implications for Archaean dating methods. Earth and Planetary Science Letters, 89(2), pp.239-259.
Clark, T, 1984. Geologie de la region du lac Cambrien, Territoire de Nouveau-Quebec. Ministere de l'Energie et des Ressources du Quebec, ET 83-02
Clauer, N., 1981. Rb—Sr and K—Ar dating of Precambrian clays and glauconies. Precambrian Research, 15(3-4), pp.331-352.
Coetzee, L.L., Beukes, N.J., Gutzmer, J. and Kakegawa, T., 2006. Links of organic carbon cycling and burial to depositional depth gradients and establishment of a snowball Earth at 2.3 Ga. Evidence from the Timeball Hill Formation, Transvaal Supergroup, South Africa. South African Journal of Geology, 109(1-2), pp.109-122.
Coffey, J.M., 2011. A paleoenvironmental study of the 2.7 Ga Tumbiana Formation, Fortescue Basin, Western Australia Ph. D (PhD Thesis, University of New South Wales, Sydney).
Condon, D., Zhu, M., Bowring, S., Wang, W., Yang, A. and Jin, Y., 2005. U-Pb ages from the neoproterozoic Doushantuo Formation, China. science, 308(5718), pp.95-98.
Corfu, F. and Stone, D., 1998. Age structure and orogenic significance of the Berens River composite batholiths, western Superior Province. Canadian Journal of Earth Sciences, 35(10), pp.1089-1109.
Corfu, F., Krogh, T.E., Kwok, Y.Y. and Jensen, L.S., 1989. U–Pb zircon geochronology in the southwestern Abitibi greenstone belt, Superior Province. Canadian Journal of Earth Sciences, 26(9), pp.1747-1763.
Cornell, D., Zack, T., Andersen, T., Corfu, F., Frei, D. and Van Schijndel, V., 2016. Th-U-Pb zircon geochronology of the Palaeoproterozoic Hartley Formation porphyry by six methods, with age uncertainty approaching 1 Ma. South African Journal of Geology 2016, 119(3), pp.473-494.
Cox, G.M., Isakson, V., Hoffman, P.F., Gernon, T.M., Schmitz, M.D., Shahin, S., Collins, A.S., Preiss, W., Blades, M.L., Mitchell, R.N. and Nordsvan, A., 2018. South Australian U-Pb zircon (CA-ID-TIMS) age supports globally synchronous Sturtian deglaciation. Precambrian Research, 315, pp.257-263.
Cui, H., Kitajima, K., Spicuzza, M.J., Fournelle, J.H., Ishida, A., Brown, P.E. and Valley, J.W., 2018. Searching for the great oxidation event in North America: A reappraisal of the huronian Supergroup by SIMS sulfur four-isotope analysis. Astrobiology, 18(5), pp.519-538.
Cui, M., Zhang, B. and Zhang, L., 2011. U–Pb dating of baddeleyite and zircon from the Shizhaigou diorite in the southern margin of North China Craton: constrains on the timing and tectonic setting of the Paleoproterozoic Xiong'er Group. Gondwana Research, 20(1), pp.184-193.
Cumming, V.M., Poulton, S.W., Rooney, A.D. and Selby, D., 2013. Anoxia in the terrestrial environment during the late Mesoproterozoic. Geology, 41(5), pp.583-586.
Da Silva, R., 2011. Distribution and geochronology of unconformity-bound sequences in paleoproterozoic Elim-Olifantshoek red beds: implications for timing of formation of Sishen-type iron ore and heavy carbonate carbon isotope excursion (M.Sc Thesis, University of Johannesburg).
Davis, D.W. and Green, J.C., 1997. Geochronology of the North American Midcontinent rift in western Lake Superior and implications for its geodynamic evolution. Canadian Journal of Earth Sciences, 34(4), pp.476-488.
Davis, D.W. and Paces, J.B., 1990. Time resolution of geologic events on the Keweenaw Peninsula and implications for development of the Midcontinent Rift system. Earth and Planetary Science Letters, 97(1-2), pp.54-64.
Davis, D.W. and Sutcliffe, R.H., 1985. U-Pb ages from the Nipigon plate and northern Lake Superior. Geological Society of America Bulletin, 96(12), pp.1572-1579.
Davis, W.J., and Bleeker, W. 2007: New ages for Paleoproterozoic mafic intrusions in the western Slave Province and their potential relationship to tectonic events in the adjacent Wopmay orogen. GAC-MAC 2007, Yellowknife, NT, pp. 20.
Dawes, P.R., 1997. The proterozoic thule supergroup, Greenland and Canada: history, lithostratigraphy and development. Geology of Greenland Survey Bulletin, 174, pp.1-150.
Dazhong, S., Weixing, H., Min, T., Fengqing, Z. and Condie, K.C., 1990. Origin of Late Archean and Early Proterozoic rocks and associated mineral deposits from the Zhongtiao Mountains, east-central China. Precambrian Research, 47(3-4), pp.287-306.
De Kock, M.O., Beukes, N.J. and Armstrong, R.A., 2012. New SHRIMP U–Pb zircon ages from the Hartswater Group, South Africa: Implications for correlations of the Neoarchean Ventersdorp Supergroup on the Kaapvaal craton and with the Fortescue Group on the Pilbara craton. Precambrian Research, 204, pp.66-74.
De Ronde, C.E. and Kamo, S.L., 2000. An Arch˦ an arc-arc collisional event: a short-lived (ca 3 Myr) episode, Weltevreden area, Barberton greenstone belt, South Africa. Journal of African Earth Sciences, 30(2), pp.219-248.
Diergaardt, B.N., 2013. Rhyolitic Volcanism in the Onverwacht Group, Barberton Greenstone Belt (M.Sc thesis, Stellenbosch: Stellenbosch University).
Domagal-Goldman, S.D., Kasting, J.F., Johnston, D.T. and Farquhar, J., 2008. Organic haze, glaciations and multiple sulfur isotopes in the Mid-Archean Era. Earth and Planetary Science Letters, 269(1-2), pp.29-40.
Dorland, H.C., Beukes, N.J., Gutzmer, J., Evans, D.A.D. and Armstrong, R.A., 2006. Precise SHRIMP U-Pb zircon age constraints on the lower Waterberg and Soutpansberg Groups, South Africa. South African Journal of Geology, 109(1-2), pp.139-156.
Drabon, N., Galić, A., Mason, P.R. and Lowe, D.R., 2019. Provenance and tectonic implications of the 3.28–3.23 Ga Fig Tree Group, central Barberton greenstone belt, South Africa. Precambrian Research, 325, pp.1-19.
England, G.L., Rasmussen, B., Krapez, B. and Groves, D.I., 2002. Palaeoenvironmental significance of rounded pyrite in siliciclastic sequences of the Late Archaean Witwatersrand Basin: oxygen‐deficient atmosphere or hydrothermal alteration?. Sedimentology, 49(6), pp.1133-1156.
Eriksson, K.A. and Vos, R.G., 1979. A fluvial fan depositional model for Middle Proterozoic red beds from the Waterberg Group, South Africa. Precambrian Research, 9(3-4), pp.169-188.
Eriksson, P.G., Simpson, E.L., Eriksson, K.A., Bumby, A.J., Steyn, G.L. and Sarkar, S., 2000. Muddy roll-up structures in siliciclastic interdune beds of the c. 1.8 Ga Waterberg Group, South Africa. Palaios, 15(3), pp.177-183.
Evans, D.A., Sircombe, K.N., Wingate, M.T., Doyle, M., McCarthy, M., Pidgeon, R.T. and Van Niekerk, H.S., 2003. Revised geochronology of magmatism in the western Capricorn Orogen at 1805–1785 Ma: Diachroneity of the Pilbara‐Yilgarn collision. Australian Journal of Earth Sciences, 50(6), pp.853-864.
Evans, K.V., Aleinikoff, J.N., Obradovich, J.D. and Fanning, C.M., 2000. SHRIMP U-Pb geochronology of volcanic rocks, Belt Supergroup, western Montana: evidence for rapid deposition of sedimentary strata. Canadian Journal of Earth Sciences, 37(9), pp.1287-1300.
Fanning, C.M., Flint, R.B., Parker, A.J., Ludwig, K.R. and Blissett, A.H., 1988. Refined Proterozoic evolution of the Gawler craton, South Australia, through U-Pb zircon geochronology. Precambrian Research, 40, pp.363-386.
Farquhar, J., Bao, H. and Thiemens, M., 2000. Atmospheric influence of Earth's earliest sulfur cycle. Science, 289(5480), pp.756-758.
Farquhar, J., Peters, M., Johnston, D.T., Strauss, H., Masterson, A., Wiechert, U. and Kaufman, A.J., 2007. Isotopic evidence for Mesoarchaean anoxia and changing atmospheric sulphur chemistry. Nature, 449(7163), pp.706-709.
Figueiredo, M.D., 1989. Geochemical evolution of eastern Bahia, Brazil: a probable Early Proterozoic subduction-related magmatic arc. Journal of South American Earth Sciences, 2(2), pp.131-145.
Findlay, J.M., Parrish, R.R., Birkett, T.C. and Watanabe, D.H., 1995. U–Pb ages from the Nimish Formation and Montagnais glomeroporphyritic gabbro of the central New Québec Orogen, Canada. Canadian Journal of Earth Sciences, 32(8), pp.1208-1220.
Fiorentini, M.L., Beresford, S.W., Rosengren, N., Barley, M.E. and McCuaig, T.C., 2010. Contrasting komatiite belts, associated Ni–Cu–(PGE) deposit styles and assimilation histories. Australian Journal of Earth Sciences, 57(5), pp.543-566.
Franklin, J., McIlwaine, W.H., Poulsen, K.H. and Wanless, R.K., 1980. Stratigraphy and depositional setting of the Sibley Group, Thunder Bay District, Ontario, Canada. Canadian Journal of Earth Sciences, 17(5), pp.633-651.
French, J.E. and Heaman, L.M., 2010. Precise U–Pb dating of Paleoproterozoic mafic dyke swarms of the Dharwar craton, India: implications for the existence of the Neoarchean supercraton Sclavia. Precambrian Research, 183(3), pp.416-441.
Frimmel, H.E., 2018. Episodic concentration of gold to ore grade through Earth's history. Earth-Science Reviews, 180, pp.148-158.
Frimmel, H.E., Groves, D.I., Kirk, J., Ruiz, J., Chesley, J. and Minter, W.E.L., 2005. The formation and preservation of the Witwatersrand goldfields, the world’s largest gold province. Economic Geology, 100, pp.769-797.
Frimmel, H.E., Zeh, A., Lehrmann, B., Hallbauer, D. and Frank, W., 2009. Geochemical and geochronological constraints on the nature of the immediate basement next to the Mesoarchaean auriferous Witwatersrand Basin, South Africa. Journal of Petrology, 50(12), pp.2187-2220.
Fromhold, T.A. and Wallace, M.W., 2011. Nature and significance of the Neoproterozoic Sturtian–Marinoan Boundary, Northern Adelaide Geosyncline, South Australia. Australian Journal of Earth Sciences, 58(6), pp.599-613.
Gao, L., Zhang, C., Shi, X., Song, B., Wang, Z. and Liu, Y., 2008. Mesoproterozoic age for Xiamaling Formation in North China Plate indicated by zircon SHRIMP dating. Chinese Science Bulletin, 53(17), pp.2665-2671.
Gardiner, N.J., Wacey, D., Kirkland, C.L., Johnson, T.E. and Jeon, H., 2019. Zircon U–Pb, Lu–Hf and O isotopes from the 3414 Ma Strelley Pool Formation, East Pilbara Terrane, and the Palaeoarchaean emergence of a cryptic cratonic core. Precambrian Research, 321, pp.64-84.
Gauert, C.D., Brauns, M., Batchelor, D. and Simon, R., 2011. Gold provenance of the Black Reef Conglomerate, West and East Rand, South Africa. In Antofagasta, Chile, Proceedings of Society for Geology Applied to Mineral Deposits Biennial Conference, Abstract Volumes A (Vol. 76).
Geng, H., Brandl, G., Sun, M., Wong, J. and Kröner, A., 2014. Zircon ages defining deposition of the Palaeoproterozoic Soutpansberg Group and further evidence for Eoarchaean crust in South Africa. Precambrian Research, 249, pp.247-262.
Gibson, T.M., Shih, P.M., Cumming, V.M., Fischer, W.W., Crockford, P.W., Hodgskiss, M.S., Wörndle, S., Creaser, R.A., Rainbird, R.H., Skulski, T.M. and Halverson, G.P., 2018. Precise age of Bangiomorpha pubescens dates the origin of eukaryotic photosynthesis. Geology, 46(2), pp.135-138.
Glikson, A., Hickman, A., Evans, N.J., Kirkland, C.L., Park, J.W., Rapp, R. and Romano, S., 2016. A new∼ 3.46 Ga asteroid impact ejecta unit at Marble Bar, Pilbara Craton, Western Australia: A petrological, microprobe and laser ablation ICPMS study. Precambrian Research, 279, pp.103-122.
Godefroy-Rodríguez, M., Hagemann, S., LaFlamme, C. and Fiorentini, M., 2020. The multiple sulfur isotope architecture of the Golden Mile and Mount Charlotte deposits, Western Australia. Mineralium Deposita, 55(4), pp.797-822.
Golding, S.D., Duck, L.J., Young, E., Baublys, K.A., Glikson, M. and Kamber, B.S., 2011. Earliest seafloor hydrothermal systems on earth: comparison with modern analogues. In Earliest Life on Earth: Habitats, Environments and Methods of Detection (pp. 15-49). Springer, Dordrecht.
Grosch, E.G., Kosler, J., McLoughlin, N., Drost, K., Slama, J. and Pedersen, R.B., 2011. Paleoarchean detrital zircon ages from the earliest tectonic basin in the Barberton Greenstone Belt, Kaapvaal craton, South Africa. Precambrian Research, 191(1-2), pp.85-99.
Guimarães, F.S., de Freitas, M.E., Rios, F.J. and Pedrosa, T.A., 2019. Mineralogical characterization and origin of uranium mineralization in Witwatersrand-like metaconglomerate of the Moeda Formation, Quadrilátero Ferrífero, Brazil. Ore geology reviews, 106, pp.423-445.
Gumsley, A.P., Stamsnijder, J., Larsson, E., Söderlund, U., Naeraa, T., De Kock, M., Sałacińska, A., Gawęda, A., Humbert, F. and Ernst, R., 2020. Neoarchean large igneous provinces on the Kaapvaal Craton in southern Africa re-define the formation of the Ventersdorp Supergroup and its temporal equivalents. Bulletin, 132(9-10), pp.1829-1844.
Gumsley, A.P., Chamberlain, K.R., Bleeker, W., Söderlund, U., de Kock, M.O., Larsson, E.R. and Bekker, A., 2017. Timing and tempo of the Great Oxidation Event. Proceedings of the National Academy of Sciences, 114(8), pp.1811-1816.
Guo, Q., Strauss, H., Kaufman, A.J., Schröder, S., Gutzmer, J., Wing, B., Baker, M.A., Bekker, A., Jin, Q., Kim, S.T. and Farquhar, J., 2009. Reconstructing Earth's surface oxidation across the Archean-Proterozoic transition. Geology, 37(5), pp.399-402.
Guo, R., Liu, S., Gong, E., Wang, W., Wang, M., Fu, J. and Qin, T., 2017. Arc-generated metavolcanic rocks in the Anshan–Benxi greenstone belt, North China Craton: Constraints from geochemistry and zircon U–Pb–Hf isotopic systematics. Precambrian Research, 303, pp.228-250.
Guo, W., Su, W., Zhang, J, Li, H., Zhou, H., Li, H., Ettensohn, F. and Huff, W., 2019. Zircon U-Pb dating and Hf isotopes of K-bentonites from the Tieling Formation in a new exposure of the Jixian Section, Tianjin, North China Craton. Acta Petrologica Sinica, 35(8), pp.2433-2454.
Gutzmer, J. and Beukes, N.J., 1998. Earliest laterites and possible evidence for terrestrial vegetation in the Early Proterozoic. Geology, 26(3), pp.263-266.
Gutzmer, J., Nhleko, N., Beukes, N.J., Pickard, A. and Barley, M.E., 1999. Geochemistry and ion microprobe (SHRIMP) age of a quartz porphyry sill in the Mozaan Group of the Pongola Supergroup: implications for the Pongola and Witwatersrand Supergroups. South African Journal of Geology, 102(2), pp.139-146.
Guy, B.M., Beukes, N.J. and Gutzmer, J., 2010. Paleoenvironmental controls on the texture and chemical composition of pyrite from non-conglomeratic sedimentary rocks of the Mesoarchean Witwatersrand Supergroup, South Africa. South African Journal of Geology, 113(2), pp.195-228.
Guy, B.M., Ono, S., Gutzmer, J., Kaufman, A.J., Lin, Y., Fogel, M.L. and Beukes, N.J., 2012. A multiple sulfur and organic carbon isotope record from non-conglomeratic sedimentary rocks of the Mesoarchean Witwatersrand Supergroup, South Africa. Precambrian Research, 216, pp.208-231.
Guy, B.M., Ono, S., Gutzmer, J., Lin, Y. and Beukes, N.J., 2014. Sulfur sources of sedimentary “buckshot” pyrite in the auriferous conglomerates of the Mesoarchean Witwatersrand and Ventersdorp Supergroups, Kaapvaal Craton, South Africa. Mineralium Deposita, 49(6), pp.751-775.
Hadlari, T., Rainbird, R.H. and Donaldson, J.A., 2006. Alluvial, eolian and lacustrine sedimentology of a Paleoproterozoic half-graben, Baker Lake Basin, Nunavut, Canada. Sedimentary Geology, 190(1-4), pp.47-70.
Hall, C.E., 2005. SHRIMP U–Pb depositional age for the lower Hardey Formation: evidence for diachronous deposition of the lower Fortescue Group in the southern Pilbara region, Western Australia. Australian Journal of Earth Sciences, 52(3), pp.403-410.
Hamilton, M.A. and Buchan, K.L., 2010. U–Pb geochronology of the Western Channel Diabase, northwestern Laurentia: implications for a large 1.59 Ga magmatic province, Laurentia's APWP and paleocontinental reconstructions of Laurentia, Baltica and Gawler craton of southern Australia. Precambrian Research, 183(3), pp.463-473.
Hamilton, M.A. and Buchan, K.L., 2016. A 2169 Ma U–Pb baddeleyite age for the Otish Gabbro, Quebec: implications for correlation of Proterozoic magmatic events and sedimentary sequences in the eastern Superior Province. Canadian Journal of Earth Sciences, 53(2), pp.119-128.
Hamilton, M.A., 2009. U-Pb Isotopic Dating of a Diabase Dyke of the Mistassini Swarm, Québec. Ministere de Energie et Ressources Naturelles, Quebec, Report MB 2009-17.
Hannah, J.L., Bekker, A., Stein, H.J., Markey, R.J. and Holland, H.D., 2004. Primitive Os and 2316 Ma age for marine shale: implications for Paleoproterozoic glacial events and the rise of atmospheric oxygen. Earth and Planetary Science Letters, 225(1-2), pp.43-52.
Hanson, R.E., Gose, W.A., Crowley, J.L., Ramezani, J., Bowring, S.A., Bullen, D.S., Hall, R.P., Pancake, J.A. and Mukwakwami, J., 2004. Geochronology, paleomagnetism and geochemistry of 1.9 Ga dolerite intrusions in the Waterberg Group, South Africa and Botswana. South African Journal of Geology, 107(1‐2), pp.233-254.
Hardisty, D.S., Lu, Z., Bekker, A., Diamond, C.W., Gill, B.C., Jiang, G., Kah, L.C., Knoll, A.H., Loyd, S.J., Osburn, M.R. and Planavsky, N.J., 2017. Perspectives on Proterozoic surface ocean redox from iodine contents in ancient and recent carbonate. Earth and Planetary Science Letters, 463, pp.159-170.
Hardisty, D.S., Lu, Z., Planavsky, N.J., Bekker, A., Philippot, P., Zhou, X. and Lyons, T.W., 2014. An iodine record of Paleoproterozoic surface ocean oxygenation. Geology, 42(7), pp.619-622.
Hartmann, L.A., Endo, I., Suita, M.T.F., Santos, J.O.S., Frantz, J.C., Carneiro, M.A., McNaughton, N.J. and Barley, M.E., 2006. Provenance and age delimitation of Quadrilátero Ferrífero sandstones based on zircon U–Pb isotopes. Journal of South American Earth Sciences, 20(4), pp.273-285.
Hauri, E.H., Papineau, D., Wang, J. and Hillion, F., 2016. High-precision analysis of multiple sulfur isotopes using NanoSIMS. Chemical Geology, 420, pp.148-161.
He, Y., Zhao, G., Sun, M. and Xia, X., 2009. SHRIMP and LA-ICP-MS zircon geochronology of the Xiong’er volcanic rocks: implications for the Paleo-Mesoproterozoic evolution of the southern margin of the North China Craton. Precambrian Research, 168(3-4), pp.213-222.
Heaman, L.M., LeCheminant, A.N. and Rainbird, R.H., 1992. Nature and timing of Franklin igneous events, Canada: implications for a Late Proterozoic mantle plume and the break-up of Laurentia. Earth and Planetary Science Letters, 109(1-2), pp.117-131.
Hegner, E., Kröner, A. and Hunt, P., 1994. A precise U-Pb zircon age for the Archaean Pongola Supergroup volcanics in Swaziland. Journal of African Earth Sciences, 18(4), pp.339-341.
Heinrichs, T.K, 1980. Lithostratigraphische Untersuchungen in der Fig Tree Gruppe des Barberton Greenstone Belt zwischen Umsoli und Lomati (Südafrika). Gottingen, West Germany, Georg-August Universität, Gottinger Arbeiten sur Geologie und Paläontologie, v. 22, 118 p
Heubeck, C., Engelhardt, J., Byerly, G.R., Zeh, A., Sell, B., Luber, T. and Lowe, D.R., 2013. Timing of deposition and deformation of the Moodies Group (Barberton Greenstone Belt, South Africa): Very-high-resolution of Archaean surface processes. Precambrian Research, 231, pp.236-262.
Hickman, A.H., 2008. Regional review of the 3426–3350 Ma Strelley Pool Formation, Pilbara Craton, Western Australia. West Australia Geolog Surv Rec, 2008, p.15.
Hiebert, R.S., Bekker, A., Houlé, M.G. and Rouxel, O.J., 2018. Depositional setting of the Late Archean Fe oxide-and sulfide-bearing chert and graphitic argillite in the Shaw Dome, Abitibi Greenstone Belt, Canada. Precambrian Research, 311, pp.98-116.
Hiemstra, S.A., 1968. The mineralogy and petrology of the uraniferous conglomerate of the Dominion Reefs Mine, Klerksdorp area. South African Journal of Geology, 71(1), pp.1-65.
Hodgskiss, M.S., Dagnaud, O.M., Frost, J.L., Halverson, G.P., Schmitz, M.D., Swanson-Hysell, N.L. and Sperling, E.A., 2019. New insights on the Orosirian carbon cycle, early Cyanobacteria, and the assembly of Laurentia from the Paleoproterozoic Belcher Group. Earth and Planetary Science Letters, 520, pp.141-152.
Hodgskiss, M.S.W. and Sperling, E.A., Stratigraphy and shale geochemistry of the Belcher Group, Belcher Islands, southern Nunavut. Canada-Nunavut Geoscience Office Report Hodgskiss, M.S.W. and Sperling, E.A. 2020: Stratigraphy and shale geochemistry of the Belcher Group, Belcher Islands, southern Nunavut; in Summary of Activities 2019, Canada-Nunavut Geoscience Office, p. 65–78.
Hoffman, P.F., Bell, I.R., Hildebrand, R.S., Thorstad, L., 1977. Geology of the Athapuscow Aulacogen, East Arm of Great Slave Lake, District of Mackenzie. Report of Activities, 77-1A, Geological Survey of Canada, Ottawa, Ont.
Hoffman, P.F., Bowring, S.A., Buchwaldt, R. and Hildebrand, R.S., 2011. Birthdate for the Coronation paleocean: age of initial rifting in Wopmay orogen, Canada. Canadian Journal of Earth Sciences, 48(2), pp.281-293.
Hofmann, A., Bekker, A., Rouxel, O., Rumble, D. and Master, S., 2009. Multiple sulphur and iron isotope composition of detrital pyrite in Archaean sedimentary rocks: A new tool for provenance analysis. Earth and Planetary Science Letters, 286(3-4), pp.436-445.
Hofmann, A., Dirks, P.H. and Jelsma, H.A., 2001. Late Archaean foreland basin deposits, Belingwe greenstone belt, Zimbabwe. Sedimentary Geology, 141, pp.131-168.
Hokada, T., Horie, K., Satish-Kumar, M., Ueno, Y., Nasheeth, A., Mishima, K. and Shiraishi, K., 2013. An appraisal of Archaean supracrustal sequences in Chitradurga schist belt, western Dharwar Craton, southern India. Precambrian Research, 227, pp.99-119.
Horie, K., Hidaka, H. and Gauthier-Lafaye, F., 2005. U-Pb geochronolog and geochemistry of zircon from the Franceville series at Bidoudouma, Gabon. In 15th Annual Goldschmidt Conference..
Horstwood, M.S.A., 1998. Stratigraphy, geochemistry and zircon geochronology of the Midlands greenstone belt, Zimbabwe (Doctoral dissertation, University of Southampton).
Hou, K., Li, Y. and Wan, D., 2007. Constraints on the Archean atmospheric oxygen and sulfur cycle from mass-independent sulfur records from Anshan-Benxi BIFs, Liaoning Province, China. Science in China Series D: Earth Sciences, 50(10), pp.1471-1478.
Houston, R.S., 1992. New stratigraphic subdivisions and redefinition of subdivisions of Late Archean and Early Proterozoic metasedimentary and metavolcanic rocks of the Sierra Madre and Medicine Bow Mountains, southern Wyoming. USGS Professional Paper 1520
Humbert, F., De Kock, M.O., Altermann, W., Elburg, M.A., Lenhardt, N., Smith, A.J. and Masango, S., 2018. Petrology, physical volcanology and geochemistry of a Paleoproterozoic large igneous province: The Hekpoort Formation in the southern Transvaal sub-basin (Kaapvaal Craton). Precambrian Research, 315, pp.232-256.
Irving, E., Baker, J., Hamilton, M. and Wynne, P.J., 2004. Early Proterozoic geomagnetic field in western Laurentia: implications for paleolatitudes, local rotations and stratigraphy. Precambrian Research, 129(3-4), pp.251-270.
Jackson, G.D.,.Ianelli, T.R., 1989., Neohelikian reef complexes, Borden Rift Basin, Northwestern Baffin Island. In Reefs. Canada and adjacent areas (eds H. H. J. Geldsetzer, N. P. James and G. E. Tebbutt), pp. 55–63. Canadian Society of Petroleum Ge
Jackson, M.L., Sweet, I.P., Page, R.W., Bradshaw, B.E., 1999. Integrated basin analysis of the Isa superbasin using seismic, well-log and geopotential data: An evaluation of the economic potential of the Northern Lawn Hill platform. Australian Geological Survey Organisation Record, 19, pp.1-173.
Janardhan, A.S. and Basavalingu, B., 1988. Sedimentology, mineralogy and geochemistry of the Kalasapura Conglomerate. Memoir-Geological Society of India, (9), pp.65-82.
Jayananda, M., Kano, T., Peucat, J.J. and Channabasappa, S., 2008. 3.35 Ga komatiite volcanism in the western Dharwar craton, southern India: constraints from Nd isotopes and whole-rock geochemistry. Precambrian Research, 162(1-2), pp.160-179.
Jayananda, M., Peucat, J.J., Chardon, D., Rao, B.K., Fanning, C.M. and Corfu, F., 2013. Neoarchean greenstone volcanism and continental growth, Dharwar craton, southern India: constraints from SIMS U–Pb zircon geochronology and Nd isotopes. Precambrian Research, 227, pp.55-76.
Johansson, Å., Larionov, A.N., Tebenkov, A.M., Gee, D.G., Whitehouse, M.J. and Vestin, J., 1999. Grenvillian magmatism of western and central Nordaustlandet, northeastern Svalbard. Earth and Environmental Science Transactions of The Royal Society of Edinburgh, 90(3), pp.221-254.
Johnson, J.E., Gerpheide, A., Lamb, M.P. and Fischer, W.W., 2014. O2 constraints from Paleoproterozoic detrital pyrite and uraninite. GSA Bulletin, 126(5-6), pp.813-830.
Johnson, J.E., Webb, S.M., Thomas, K., Ono, S., Kirschvink, J.L. and Fischer, W.W., 2013. Manganese-oxidizing photosynthesis before the rise of cyanobacteria. Proceedings of the National Academy of Sciences, 110(28), pp.11238-11243.
Jones, D.S., Maloof, A.C., Hurtgen, M.T., Rainbird, R.H. and Schrag, D.P., 2010. Regional and global chemostratigraphic correlation of the early Neoproterozoic Shaler Supergroup, Victoria Island, northwestern Canada. Precambrian Research, 181(1-4), pp.43-63.
Jost, H., Chemale Jr, F., Dussin, I.A., Tassinari, C.C.G. and Martins, R., 2010. A U–Pb zircon Paleoproterozoic age for the metasedimentary host rocks and gold mineralization of the Crixás greenstone belt, Goiás, Central Brazil. Ore Geology Reviews, 37(2), pp.127-139.
Justo, A.P., Dantas, E.L., Freitas-Silva, F.H. and Rodrigues, J.B., 2018. Detrital zircon populations in the Neoarchean to Paleoproterozoic sedimentary coverage of Carajás, Amazon craton, Brazil. In Proceedings of the 49. Brazilian congress of geology; 7. symposium on volcanism and associated environments; 9. symposium of cretaceous from Brazil.
Kasbohm, J., Evans, D.A., Panzik, J.E., Hofmann, M. and Linnemann, U., 2016. Palaeomagnetic and geochronological data from Late Mesoproterozoic redbed sedimentary rocks on the western margin of Kalahari craton. Geological Society, London, Special Publications, 424(1), pp.145-165.
Kendall, B., Creaser, R.A., Gordon, G.W. and Anbar, A.D., 2009. Re–Os and Mo isotope systematics of black shales from the Middle Proterozoic Velkerri and Wollogorang formations, McArthur Basin, northern Australia. Geochimica et Cosmochimica Acta, 73(9), pp.2534-2558.
Kendall, B., Reinhard, C.T., Lyons, T.W., Kaufman, A.J., Poulton, S.W. and Anbar, A.D., 2010. Pervasive oxygenation along late Archaean ocean margins. Nature Geoscience, 3(9), pp.647-652.
Kendall, B., van Acken, D. and Creaser, R.A., 2013. Depositional age of the early paleoproterozoic klipputs member, nelani formation (Ghaap Group, Transvaal Supergroup, South Africa) and implications for low-level Re–Os geochronology and paleoproterozoic global correlations. Precambrian Research, 237, pp.1-12.
Ketchum, K.Y., Heaman, L.M., Bennett, G. and Hughes, D.J., 2013. Age, petrogenesis and tectonic setting of the Thessalon volcanic rocks, Huronian Supergroup, Canada. Precambrian Research, 233, pp.144-172.
Key, RM & Rundle, C., 1981. The regional significance of new isotopic ages from Precambrian windows through the" Kalahari Beds" in north-western Botswana. South African Journal of Geology, 84(1), pp.51-66.
Kiyokawa, S., Aihara, Y., Miki, T., Takehara, M. and Horie, K., 2018, December. Timing of sedimentation of the Cleaverville Formation, coastal Pilbara terrane, Pilbara, Western Australia: new age dating, identified post-accretion pull-apart system and DXCL drilling result. In AGU Fall Meeting Abstracts (Vol. 2018, pp. DI33C-0049).
Kiyokawa, S., Aihara, Y., Takehara, M. and Horie, K., 2019. Timing and development of sedimentation of the Cleaverville Formation and a post‐accretion pull‐apart system in the Cleaverville area, coastal Pilbara Terrane, Pilbara, Western Australia. Island Arc, 28(6), p.e12324.
Kiyokawa, S., Taira, A., Byrne, T., Bowring, S. and Sano, Y., 2002. Structural evolution of the middle Archean coastal Pilbara terrane, Western Australia. Tectonics, 21(5), pp.8-1.
Klein, R., Pesonen, L.J., Salminen, J. and Mertanen, S., 2014. Paleomagnetism of Mesoproterozoic Satakunta sandstone, Western Finland. Precambrian Research, 244, pp.156-169.
Knoll, A.H. and Beukes, N.J., 2009. Introduction: Initial investigations of a Neoarchean shelf margin-basin transition (Transvaal Supergroup, South Africa). Precambrian Research, 169(1-4), pp.1-14.
Kohler, E.A. and Anhaeusser, C.R., 2002. Geology and geodynamic setting of Archaean silicic metavolcaniclastic rocks of the Bien Venue Formation, Fig Tree Group, northeast Barberton greenstone belt, South Africa. Precambrian Research, 116(3-4), pp.199-235.
Kohonen, J., Pihlaja, P., Kujala, H. and Marmo, J., 1993. Sedimentation of the Jotnian Satakunta sandstone, western Finland. Bulletin-Geological survey of Finland, (369).
Konnunaho, J.P., Hanski, E.J., Bekker, A., Halkoaho, T.A.A., Hiebert, R.S. and Wing, B.A., 2013. The Archean komatiite-hosted, PGE-bearing Ni–Cu sulfide deposit at Vaara, eastern Finland: evidence for assimilation of external sulfur and post-depositional desulfurization. Mineralium Deposita, 48(8), pp.967-989.
Kositcin, N. and Krapež, B., 2004. Relationship between detrital zircon age-spectra and the tectonic evolution of the Late Archaean Witwatersrand Basin, South Africa. Precambrian Research, 129(1-2), pp.141-168.
Kositcin, N., Brown, S.J., Barley, M.E., Krapež, B., Cassidy, K.F. and Champion, D.C., 2008. SHRIMP U-Pb zircon age constraints on the Late Archaean tectonostratigraphic architecture of the Eastern Goldfields superterrane, Yilgarn craton, Western Australia. Precambrian Research, 161(1-2), pp.5-33.
Kouassi, F., 1979. Étude stratigraphique et analyse de la dispersion des éléments tracés dans le membre inférieur de la formation d'Albanel, du groupe de Mistassini, région du lac Mistassini, Québec, Canada. Université du Québec à Chicoutimi. (PhD Thesis)
Kranendonk, M.J.V., Hickman, A.H., Smithies, R.H., Nelson, D.R. and Pike, G., 2002. Geology and tectonic evolution of the archean North Pilbara terrain, Pilbara Craton, Western Australia. Economic Geology, 97(4), pp.695-732.
Krapez, B., 1985. The Ventersdorp Contact placer: a gold‐pyrite placer of stream and debris‐flow origins from the Archaean Witwatersrand Basin of South Africa. Sedimentology, 32(2), pp.223-234.
Krogh, T.E., Davis, D.W., Corfu, F., Pye, E.G., Naldrett, A.J. and Giblin, P.E., 1984. Precise U-Pb zircon and baddeleyite ages for the Sudbury area. In The geology and ore deposits of the Sudbury structure (Vol. 1, pp. 431-446). Toronto, Ont., Canada: Ontario Geological Survey.
Kröner, A., Byerly, G.R. and Lowe, D.R., 1991. Chronology of early Archaean granite-greenstone evolution in the Barberton Mountain Land, South Africa, based on precise dating by single zircon evaporation. Earth and Planetary Science Letters, 103(1-4), pp.41-54.
Kröner, A., Hegner, E., Wendt, J.I. and Byerly, G.R., 1996. The oldest part of the Barberton granitoid-greenstone terrain, South Africa: evidence for crust formation between 3.5 and 3.7 Ga. Precambrian Research, 78(1-3), pp.105-124.
Kurzweil, F., Claire, M., Thomazo, C., Peters, M., Hannington, M. and Strauss, H., 2013. Atmospheric sulfur rearrangement 2.7 billion years ago: Evidence for oxygenic photosynthesis. Earth and Planetary Science Letters, 366, pp.17-26.
LeCheminant, A.N. and Heaman, L.M., 1989. Mackenzie igneous events, Canada: Middle Proterozoic hotspot magmatism associated with ocean opening. Earth and Planetary Science Letters, 96(1-2), pp.38-48.
Ledru, P., Mile, J.P., Johan, V., Sabaté, P. and Maluski, H., 1997. Foreland basins and gold-bearing conglomerates: a new model for the Jacobina Basin (Sa˜ o Francisco province, Brazil). Precambrian Research, 86(3-4), pp.155-176.
Lehtonen, E., Heilimo, E., Halkoaho, T., Hölttä, P. and Huhma, H., 2017. The temporal variation of Mesoarchaean volcanism in the Suomussalmi greenstone belt, Karelia Province, Eastern Finland. International Journal of Earth Sciences, 106(2), pp.763-781.
Lenhardt, N., Altermann, W., Humbert, F. and de Kock, M., 2020. Lithostratigraphy of the Palaeoproterozoic Hekpoort Formation (Pretoria Group, Transvaal Supergroup), South Africa. South African Journal of Geology 2020, 123(4), pp.655-668.
Lenhardt, N., Bleeker, W., Ngwa, C.N. and Aucamp, T., 2020. Shallow marine basaltic volcanism of the Machadodorp Member (Silverton Formation, Pretoria Group), Transvaal Basin, South Africa—An example of Paleoproterozoic explosive intraplate volcanic activity in an epeiric embayment. Precambrian Research, 338, p.105580.
Li, H.K., Su, W.B., Zhou, H.Y., Xiang, Z.Q., Tian, H., Zhang, J., Geng, J.Z., Yyang, L.G., Warren D.H., Frank R.E., 2014. The first precise age constraint on the Jixian System of the Meso-to Neoproterozoic Standard Section of China, SHRIMP zircon U-Pb dating of bentonites from the Wumishan and Tieling formations in the Jixian Section, North China. Acta Petrologica Sinica, 30(10), pp.2999-3012.
Li, J., Zhang, Z., Stern, R.A., Hannah, J.L., Stein, H.J., Yang, G. and Li, L., 2017. Primary multiple sulfur isotopic compositions of pyrite in 2.7 Ga shales from the Joy Lake sequence (Superior Province) show felsic volcanic array-like signature. Geochimica et Cosmochimica Acta, 202, pp.310-340.
Li, Z. and Chen, B., 2014. Geochronology and geochemistry of the Paleoproterozoic meta-basalts from the Jiao-Liao-Ji Belt, North China Craton: implications for petrogenesis and tectonic setting. Precambrian Research, 255, pp.653-667.
Liu, A., Tang, D., Shi, X., Zhou, X., Zhou, L., Shang, M., Li, Y. and Fang, H., 2020. Mesoproterozoic oxygenated deep seawater recorded by early diagenetic carbonate concretions from the Member IV of the Xiamaling Formation, North China. Precambrian Research, 341, p.105667.
Liu, Y., Zhong, N., Tian, Y., Qi, W. and Mu, G., 2011. The oldest oil accumulation in China: Meso-proterozoic Xiamaling Formation bituminous sandstone reservoirs. Petroleum Exploration and Development, 38(4), pp.503-512.
Long, D.G. and Turner, E.C., 2012. Tectonic, sedimentary and metallogenic re-evaluation of basal strata in the Mesoproterozoic Bylot basins, Nunavut, Canada: Are unconformity-type uranium concentrations a realistic expectation?. Precambrian Research, 214, pp.192-209.
Long, D.G.F., Ulrich, T. and Kamber, B.S., 2011. Laterally extensive modified placer gold deposits in the Paleoproterozoic Mississagi Formation, Clement and Pardo Townships, Ontario. Canadian Journal of Earth Sciences, 48(5), pp.779-792.
Lu, S. and Li, H., 1991. A precise U-Pb single zircon age determination for the volcanics of Dahongyu Formation, Changcheng System in Jixian. Acta Geosicientia Sinica, 22(1), pp.137-145.
Luo, Y., Sun, M., Zhao, G., Li, S., Ayers, J.C., Xia, X. and Zhang, J., 2008. A comparison of U–Pb and Hf isotopic compositions of detrital zircons from the North and South Liaohe Groups: constraints on the evolution of the Jiao-Liao-Ji Belt, North China Craton. Precambrian Research, 163(3-4), pp.279-306.
Macdonald, F.A., Schmitz, M.D., Crowley, J.L., Roots, C.F., Jones, D.S., Maloof, A.C., Strauss, J.V., Cohen, P.A., Johnston, D.T. and Schrag, D.P., 2010. Calibrating the cryogenian. science, 327(5970), pp.1241-1243.
Macdonald, F.A., Schmitz, M.D., Strauss, J.V., Halverson, G.P., Gibson, T.M., Eyster, A., Cox, G., Mamrol, P. and Crowley, J.L., 2018. Cryogenian of Yukon. Precambrian Research, 319, pp.114-143.
Machado, N., Lindenmayer, Z., Krogh, T.E. and Lindenmayer, D., 1991. U-Pb geochronology of Archean magmatism and basement reactivation in the Carajás area, Amazon shield, Brazil. Precambrian Research, 49(3-4), pp.329-354.
Machado, N., Zwanzig, H. and Parent, M., 2000. U-Pb ages of plutonism, sedimentation, and metamorphism of the Paleoproterozoic Kisseynew metasedimentary belt, Trans-Hudson Orogen (Manitoba, Canada). Canadian Journal of Earth Sciences, 36(11), pp.1829-1842.
Mackie, R.A., Scoates, J.S. and Weis, D., 2009. Age and Nd–Hf isotopic constraints on the origin of marginal rocks from the Muskox layered intrusion (Nunavut, Canada) and implications for the evolution of the 1.27 Ga Mackenzie large igneous province. Precambrian Research, 172(1-2), pp.46-66.
Mahon, R.C., Dehler, C.M., Link, P.K., Karlstrom, K.E. and Gehrels, G.E., 2014. Geochronologic and stratigraphic constraints on the Mesoproterozoic and Neoproterozoic Pahrump Group, Death Valley, California: A record of the assembly, stability, and breakup of Rodinia. Bulletin, 126(5-6), pp.652-664.
Malone, D.H., Stein, C.A., Craddock, J.P., Kley, J., Stein, S. and Malone, J.E., 2016. Maximum depositional age of the Neoproterozoic Jacobsville Sandstone, Michigan: Implications for the evolution of the Midcontinent Rift. Geosphere, 12(4), pp.1271-1282.
Mapeo, R.B.M., Ramokate, L.V., Armstrong, R.A. and Kampunzu, A.B., 2004. U-Pb zircon age of the upper Palapye group (Botswana) and regional implications. Journal of African Earth Sciences, 40(1-2), pp.1-16.
Marin‐Carbonne, J., Busigny, V., Miot, J., Rollion‐Bard, C., Muller, E., Drabon, N., Jacob, D., Pont, S., Robyr, M., Bontognali, T.R. and François, C., 2020. In Situ Fe and S isotope analyses in pyrite from the 3.2 Ga Mendon Formation (Barberton Greenstone Belt, South Africa): Evidence for early microbial iron reduction. Geobiology, 18(3), pp.306-325.
Martin, A.P., Condon, D.J., Prave, A.R. and Lepland, A., 2013. A review of temporal constraints for the Palaeoproterozoic large, positive carbonate carbon isotope excursion (the Lomagundi–Jatuli Event). Earth-Science Reviews, 127, pp.242-261.
Martin, D.M., Clendenin, C.W., Krapez, B. and McNaughton, N.J., 1998. Tectonic and geochronological constraints on late Archaean and Palaeoproterozoic stratigraphic correlation within and between the Kaapvaal and Pilbara Cratons. Journal of the Geological Society, 155(2), pp.311-322.
Master, S., Rainaud, C., Armstrong, R.A., Phillips, D. and Robb, L.J., 2005. Provenance ages of the Neoproterozoic Katanga Supergroup (Central African Copperbelt), with implications for basin evolution. Journal of African Earth Sciences, 42(1-5), pp.41-60.
McDivitt, J.A., Hagemann, S.G., Thébaud, N., Martin, L.A. and Rankenburg, K., 2021. Deformation, magmatism, and sulfide mineralization in the Archean Golden Mile fault zone, Kalgoorlie gold camp, Western Australia. Economic Geology, 116(6), pp.1285-1308.
McNaughton, N.J., Compston, W. and Barley, M.E., 1993. Constraints on the age of the Warrawoona Group, eastern Pilbara block, Western Australia. Precambrian Research, 60(1-4), pp.69-98.
Melezhik, V.A., Fallick, A.E., Rychanchik, D.V. and Kuznetsov, A.B., 2005. Palaeoproterozoic evaporites in Fennoscandia: implications for seawater sulphate, the rise of atmospheric oxygen and local amplification of the δ13C excursion. Terra Nova, 17(2), pp.141-148.
Mills, A.J., Dunning, G.R., Murphy, M. and Langille, A., 2017. New geochronological constraints on the timing of magmatism for the Bull Arm Formation, Musgravetown Group, Avalon terrane, northeastern Newfoundland. Current Research: Newfoundland and Labrador Department of Natural Resources, Geological Survey, 17(1), pp.1-17.
Minter, W.E.L., Goedhart, M., Knight, J. and Frimmel, H.E., 1993. Morphology of Witwatersrand gold grains from the Basal Reef; evidence for their detrital origin. Economic Geology, 88(2), pp.237-248.
Minter, W.E.L., Renger, F.E. and Siegers, A., 1990. Early Proterozoic gold placers of the Moeda Formation within the Gandarela Syncline, Minas Gerais, Brazil. Economic Geology, 85(5), pp.943-951.
Mishima, K., Yamazaki, R., Satish-Kumar, M., Ueno, Y., Hokada, T. and Toyoshima, T., 2017. Multiple sulfur isotope geochemistry of Dharwar Supergroup, Southern India: Late Archean record of changing atmospheric chemistry. Earth and Planetary Science Letters, 464, pp.69-83.
Mitchell, R.L. and Sheldon, N.D., 2010. The∼ 1100 Ma Sturgeon Falls paleosol revisited: Implications for Mesoproterozoic weathering environments and atmospheric CO2 levels. Precambrian Research, 183(4), pp.738-748.
Mitchell, R.N., Hoffman, P.F. and Evans, D.A., 2010. Coronation loop resurrected: Oscillatory apparent polar wander of Orosirian (2.05–1.8 Ga) paleomagnetic poles from Slave craton. Precambrian Research, 179(1-4), pp.121-134.
Modie, B.N., 1996. Depositional environments of the Meso-to Neoproterozoic Ghanzi-Chobe belt, northwest Botswana. Journal of African Earth Sciences, 22(3), pp.255-268.
Modie, B.N., 2000. Geology and mineralisation in the Meso-to Neoproterozoic Ghanzi-Chobe Belt of northwest Botswana. Journal of African Earth Sciences, 30(3), pp.467-474.
Mojzsis, S.J., Coath, C.D., Greenwood, J.P., McKeegan, K.D. and Harrison, T.M., 2003. Mass-independent isotope effects in Archean (2.5 to 3.8 Ga) sedimentary sulfides determined by ion microprobe analysis. Geochimica et Cosmochimica Acta, 67(9), pp.1635-1658.
Moore, J.M., Polteau, S., Armstrong, R.A., Corfu, F. and Tsikos, H., 2012. The age and correlation of the Postmasburg Group, southern Africa: Constraints from detrital zircon grains. Journal of African Earth Sciences, 64, pp.9-19.
Mukasa, S.B., Wilson, A.H. and Young, K.R., 2013. Geochronological constraints on the magmatic and tectonic development of the Pongola Supergroup (Central Region), South Africa. Precambrian Research, 224, pp.268-286.
Mukhopadhyay, J., Mishra, B., Chakrabarti, K., De, S. and Ghosh, G., 2016. Uraniferous paleoplacers of the Mesoarchean Mahagiri Quartzite, Singhbhum craton, India: Depositional controls, nature and source of> 3.0 Ga detrital uraninites. Ore Geology Reviews, 72, pp.1290-1306.
Müller, S.G., Krapez, B., Barley, M.E. and Fletcher, I.R., 2005. Giant iron-ore deposits of the Hamersley province related to the breakup of Paleoproterozoic Australia: new insights from in situ SHRIMP dating of baddeleyite from mafic intrusions. Geology, 33(7), pp.577-580.
Neil, B.J., Gibson, H.D., Pehrsson, S.J., Martel, E., Thiessen, E.J. and Crowley, J.L., 2021. Provenance, stratigraphic and precise depositional age constraints for an outlier of the 1.9 to 1.8 Ga Nonacho Group, Rae craton, Northwest Territories, Canada. Precambrian Research, 352, p.105999.
Nelson, D.R., 1997. Compilation of SHRIMP U-Pb zircon geochronology date, 1996. Western Australia Geological Survey, Record.
Nelson, D.R., 1998. Granite–greenstone crust formation on the Archaean Earth: a consequence of two superimposed processes. Earth and Planetary Science Letters, 158(3-4), pp.109-119.
Nelson, D.R., 2000. Compilation of geochronology data, 1999: Western Australia Geological Survey. Record, 2, p.251.
Nelson, D.R., 2005. 178042: altered volcaniclastic sandstone, Table Top Well, Geochronology dataset 564. Geological Survey of Australia Compilation of geochronology data.
Nelson, D.R., Trendall, A.F. and Altermann, W., 1999. Chronological correlations between the Pilbara and Kaapvaal cratons. Precambrian Research, 97(3-4), pp.165-189.
Ngobeli, R., 2019. A Comparison between Detrital Zircon Age Populations of the Koegas Subgroup of the Ghaap Group and Overlying Makganyene Diamictite of the Postmasburg Group, Transvaal Supergroup, Griqualand West Area. University of Johannesburg (South Africa). (M.Sc Thesis)
Nozhkin, A.D., 1999. Riphean granite-gneiss domes of the Yenisei ridge: geological structure and U-Pb isotopic age. Russ. Geol. Geophys., 40, pp.1305-1313.
Nutman, A.P., Bennett, V.C., Friend, C.R., Hidaka, H., Yi, K., Lee, S.R. and Kamiichi, T., 2013. The Itsaq Gneiss Complex of Greenland: Episodic 3900 to 3660 Ma juvenile crust formation and recycling in the 3660 to 3600 Ma Isukasian orogeny. American Journal of Science, 313(9), pp.877-911.
Nwaila, G.T. and Frimmel, H.E., 2019. Highly siderophile elements in Archaean and Palaeoproterozoic marine shales of the Kaapvaal Craton, South Africa. Mineralogy and Petrology, 113(3), pp.307-327.
O’Brien, S.J. and King, A.F., 2002. Neoproterozoic stratigraphy of the Bonavista Peninsula: preliminary results, regional correlations and implications for sediment-hosted stratiform copper exploration in the Newfoundland Avalon Zone. Current Research. Newfoundland Department of Mines and Energy, Geological Survey, Report, pp.02-1.
Ohmoto, H., Watanabe, Y., Ikemi, H., Poulson, S.R. and Taylor, B.E., 2006. Sulphur isotope evidence for an oxic Archaean atmosphere. Nature, 442(7105), pp.908-911.
Ono, S., Beukes, N.J. and Rumble, D., 2009. Origin of two distinct multiple-sulfur isotope compositions of pyrite in the 2.5 Ga Klein Naute Formation, Griqualand West Basin, South Africa. Precambrian Research, 169(1-4), pp.48-57.
Ono, S., Beukes, N.J., Rumble, D. and Fogel, M.L., 2006. Early evolution of atmospheric oxygen from multiple-sulfur and carbon isotope records of the 2.9 Ga Mozaan Group of the Pongola Supergroup, Southern Africa. South African Journal of Geology, 109(1-2), pp.97-108.
Ono, S., Eigenbrode, J.L., Pavlov, A.A., Kharecha, P., Rumble III, D., Kasting, J.F. and Freeman, K.H., 2003. New insights into Archean sulfur cycle from mass-independent sulfur isotope records from the Hamersley Basin, Australia. Earth and Planetary Science Letters, 213(1-2), pp.15-30.
Ono, S., Kaufman, A.J., Farquhar, J., Sumner, D.Y. and Beukes, N.J., 2009. Lithofacies control on multiple-sulfur isotope records and Neoarchean sulfur cycles. Precambrian Research, 169(1-4), pp.58-67.
Orberger, B., Hoffmann, A., Hicks, N., Wirth, R., Tudryn, A. and Megneng, M., 2011, September. Uranium mineralization in carbonaceous chert pebbles from Mesoarchean Mozaan Group conglomerates (~ 3 Ga, Pongola Basin, South Africa): trap or source rock?. In Antofagasta, Chile, Proceedings of Society for Geology Applied to Mineral Deposits Biennial Conference, Abstract Volumes A (Vol. 301).
Ossa, F.O., Hofmann, A., Ballouard, C., Vorster, C., Schoenberg, R., Fiedrich, A., Mayaga-Mikolo, F. and Bekker, A., 2020. Constraining provenance for the uraniferous Paleoproterozoic Francevillian Group sediments (Gabon) with detrital zircon geochronology and geochemistry. Precambrian Research, 343, p.105724.
Ovchinnikova, G.V., Kuznetsov, A.B., Melezhik, V.A., Gorokhov, I.M., Vasil’eva, I.M. and Gorokhovskii, B.M., 2007. Pb-Pb age of Jatulian carbonate rocks: the Tulomozero Formation of southeast Karelia. Stratigraphy and Geological Correlation, 15(4), pp.359-372.
Ovchinnikova, G.V., Semikhatov, M.A., Gorokhov, I.M., Belyatskii, B.V., Vasilieva, I.M. and Levskii, L.K., 1995. U-Pb systematics of Pre-Cambrian carbonates: the riphean sukhaya tunguska formation in the Turukhansk Uplift, Siberia. Lithology and Mineral Resources, 30(5), pp.477-487.
Page, R.W., Jackson, M.J. and Krassay, A.A., 2000. Constraining sequence stratigraphy in north Australian basins: SHRIMP U–Pb zircon geochronology between Mt Isa and McArthur River. Australian Journal of Earth Sciences, 47(3), pp.431-459.
Papineau, D., Mojzsis, S.J. and Schmitt, A.K., 2007. Multiple sulfur isotopes from Paleoproterozoic Huronian interglacial sediments and the rise of atmospheric oxygen. Earth and Planetary Science Letters, 255(1-2), pp.188-212.
Papunen H, Halkoaho T, Luukkonen E (2009) Archaean evolution of the Tipasjärvi–Kuhmo–Suomussalmi Greenstone Complex, Fin- land. Geological Survey of Finland, Bulletin, vol 403, 68 pp
Parnell, J., Boyce, A.J., Mark, D., Bowden, S. and Spinks, S., 2010. Early oxygenation of the terrestrial environment during the Mesoproterozoic. Nature, 468(7321), pp.290-293.
Parnell, J., Mark, D., Fallick, A.E., Boyce, A. and Thackrey, S., 2011. The age of the Mesoproterozoic Stoer Group sedimentary and impact deposits, NW Scotland. Journal of the Geological Society, 168(2), pp.349-358.
Parnell, J., Spinks, S. and Brolly, C., 2018. Tellurium and selenium in Mesoproterozoic red beds. Precambrian Research, 305, pp.145-150.
Pedreira, A.J. and De Waele, B., 2008. Contemporaneous evolution of the Palaeoproterozoic–Mesoproterozoic sedimentary basins of the São Francisco–Congo Craton. Geological Society, London, Special Publications, 294(1), pp.33-48.
Pehrsson, S.J. and Buchan, K.L., 1999. Borden dykes of Baffin Island, Northwest Territories: a Franklin U-Pb baddeleyite age and a paleomagnetic reinterpretation. Canadian Journal of Earth Sciences, 36(1), pp.65-73.
Peng, Q.M. and Palmer, M.R., 2002. The Paleoproterozoic mg and mg-Fe borate deposits of Liaoning and Jilin provinces, Northeast China. Economic Geology, 97(1), pp.93-108.
Pereira, E., Tassinari, C.C., Rodrigues, J.F. and Van-Dúnem, M.V., 2011. New data on the deposition age of the volcano-sedimentary Chela Group and its Eburnean basement: implications to post-Eburnean crustal evolution of the SW of Angola. Comunicações Geológicas.
Philippot, P., Ávila, J.N., Killingsworth, B.A., Tessalina, S., Baton, F., Caquineau, T., Muller, E., Pecoits, E., Cartigny, P., Lalonde, S.V. and Ireland, T.R., 2018. Globally asynchronous sulphur isotope signals require re-definition of the Great Oxidation Event. Nature communications, 9(1), pp.1-10.
Pickard, A.L., 2003. SHRIMP U–Pb zircon ages for the Palaeoproterozoic Kuruman Iron Formation, northern Cape Province, South Africa: evidence for simultaneous BIF deposition on Kaapvaal and Pilbara cratons. Precambrian Research, 125(3-4), pp.275-315.
Pienaar, P.J., 1963. Stratigraphy, petrology, and genesis of the Elliot Group, Blind River, Ontario, including the Uraniferous Conglomerate; Geol. Surv. Canada. Bull, 83.
Pope, M.C. and Grotzinger, J.P., 2003. Paleoproterozoic Stark Formation, Athapuscow basin, northwest Canada: Record of cratonic-scale salinity crisis. Journal of Sedimentary Research, 73(2), pp.280-295.
Poulton, S.W., Bekker, A., Cumming, V.M., Zerkle, A.L., Canfield, D.E. and Johnston, D.T., 2021. A 200-million-year delay in permanent atmospheric oxygenation. Nature, 592(7853), pp.232-236.
Prasad, N. and Roscoe, S.M., 1996. Evidence of anoxic to oxic atmospheric change during 2.45-2.22 Ga from lower and upper sub-Huronian paleosols, Canada. Catena, 27(2), pp.105-121.
Premo, W.R., Van Schmus, W.R., 1989. Zircon geochronology of Precambrian rocks in southeastern Wyoming and northern Colorado. In: Grambling, J.A., Tewksbury, B.J. (Eds.), Proterozoic Geology of the Southern Rocky Mountains. Geol. Soc. Am. Spec. Pap. 235, 13_x0001_/32
Prendergast, M.D. and Wingate, M.T.D., 2013. Zircon geochronology of late Archean komatiitic sills and their felsic country rocks, south-central Zimbabwe: a revised age for the Reliance komatiitic event and its implications. Precambrian Research, 229, pp.105-124.
Prendergast, M.D., 2004. Contact relations between the Koodoovale-and Manjeri-type lithostratigraphic units of the late Archaean Bulawayan Supergroup at Hunters Road, central Zimbabwe. South African Journal of Geology, 107(3), pp.325-332.
Puchtel, I.S., Arndt, N.T., Hofmann, A.W., Haase, K.M., Kröner, A., Kulikov, V.S., Kulikova, V.V., Garbe-Schönberg, C.D. and Nemchin, A.A., 1998. Petrology of mafic lavas within the Onega plateau, central Karelia: evidence for 2.0 Ga plume-related continental crustal growth in the Baltic Shield. Contributions to Mineralogy and Petrology, 130(2), pp.134-153.
Rai, A.K., Pandey, U.K., Zakaulla, S. and Parihar, P.S., 2015. New 1.9-2.0 Ga, Pb-Pb (PbSL), Age of Dolomites from Vempalle Formation, Lower Cuddapah Supergroup, Eastern Dharwar Craton, India. Journal of the Geological Society of India, 86(2), pp.131-136.
Rainbird, R.H., Davis, W.J., Stern, R.A., Peterson, T.D., Smith, S.R., Parrish, R.R. and Hadlari, T., 2006. Ar-Ar and U-Pb geochronology of a Late Paleoproterozoic rift basin: Support for a genetic link with Hudsonian orogenesis, western Churchill Province, Nunavut, Canada. The Journal of Geology, 114(1), pp.1-17.
Rainbird, R.H., Hadlari, T., Aspler, L.B., Donaldson, J.A., LeCheminant, A.N. and Peterson, T.D., 2003. Sequence stratigraphy and evolution of the Paleoproterozoic intracontinental Baker Lake and Thelon basins, western Churchill Province, Nunavut, Canada. Precambrian Research, 125(1-2), pp.21-53.
Rainbird, R.H., Hamilton, M.A. and Young, G.M., 2001. Detrital zircon geochronology and provenance of the Torridonian, NW Scotland. Journal of the Geological Society, 158(1), pp.15-27.
Rainbird, R.H., Rooney, A.D., Creaser, R.A. and Skulski, T., 2020. Shale and pyrite Re-Os ages from the Hornby Bay and Amundsen basins provide new chronological markers for Mesoproterozoic stratigraphic successions of northern Canada. Earth and Planetary Science Letters, 548, p.116492.
Raju, P.S. and Mazumder, R., 2020. Archean sedimentation on Dharwar Craton, India and its implications. Earth-Science Reviews, 202, p.102999.
Rasmussen, B. and Buick, R., 1999. Redox state of the Archean atmosphere: evidence from detrital heavy minerals in ca. 3250–2750 Ma sandstones from the Pilbara Craton, Australia. Geology, 27(2), pp.115-118.
Rasmussen, B., Bekker, A. and Fletcher, I.R., 2013. Correlation of Paleoproterozoic glaciations based on U–Pb zircon ages for tuff beds in the Transvaal and Huronian Supergroups. Earth and Planetary Science Letters, 382, pp.173-180.
Rasmussen, B., Blake, T.S. and Fletcher, I.R., 2005. U-Pb zircon age constraints on the Hamersley spherule beds: Evidence for a single 2.63 Ga Jeerinah-Carawine impact ejecta layer. Geology, 33(9), pp.725-728.
Rasmussen, B., Muhling, J.R., Zi, J.W., Tsikos, H. and Fischer, W.W., 2020. A 1.25 Ga depositional age for the “Paleoproterozoic” Mapedi red beds, Kalahari manganese field, South Africa: New constraints on the timing of oxidative weathering and hematite mineralization. Geology, 48(1), pp.44-48.
Rayner, N.M. and Rainbird, R.H., 2013. U–Pb geochronology of the Shaler Supergroup, Victoria Island, northwest Canada: 2009–2013. Geological Survey of Canada, Open File, 7419(62), pp.10-4095.
Retallack, G.J., 2018. The oldest known paleosol profiles on Earth: 3.46 Ga Panorama Formation, western Australia. Palaeogeography, Palaeoclimatology, Palaeoecology, 489, pp.230-248.
Robb, L.J. and Meyer, F.M., 1995. The Witwatersrand Basin, South Africa: geological framework and mineralization processes. Ore Geology Reviews, 10(2), pp.67-94.
Robb, L.J., Davis, D.W., Kamo, S.L. and Meyer, F.M., 1992. Ages of altered granites adjoining the Witwatersrand Basin with implications for the origin of gold and uranium. Nature, 357(6380), pp.677-680.
Robinson, A. and Spooner, E.T., 1982. Source of the detrital components of uraniferous conglomerates, Quirke ore zone, Elliot Lake, Ontario, Canada. Nature, 299(5884), pp.622-624.
Roerdink, D.L., Mason, P.R., Farquhar, J. and Reimer, T., 2012. Multiple sulfur isotopes in Paleoarchean barites identify an important role for microbial sulfate reduction in the early marine environment. Earth and Planetary Science Letters, 331, pp.177-186.
Rogala, B., Fralick, P.W., Heaman, L.M. and Metsaranta, R., 2007. Lithostratigraphy and chemostratigraphy of the Mesoproterozoic Sibley Group, northwestern Ontario, Canada. Canadian Journal of Earth Sciences, 44(8), pp.1131-1149.
Rohon, M.L., Vialette, Y., Clark, T., Roger, G., Ohnenstetter, D. and Vidal, P., 1993. Aphebian mafic–ultramafic magmatism in the Labrador Trough (New Quebec): its age and the nature of its mantle source. Canadian Journal of Earth Sciences, 30(8), pp.1582-1593.
Rollison, L.A., 2016. Stratigraphy, sedimentology, and geochemistry of the Pandurra Formation, University of Adelaide (Australia). (PhD Thesis)
Romer, R.L., Schärer, U., Wardle, R.J. and Wilton, D.H.C., 1995. U–Pb age of the Seal Lake Group, Labrador: relationship to Mesoproterozoic extension-related magmatism of Laurasia. Canadian Journal of Earth Sciences, 32(9), pp.1401-1410.
Rooney, A.D., Cantine, M.D., Bergmann, K.D., Gómez-Pérez, I., Al Baloushi, B., Boag, T.H., Busch, J.F., Sperling, E.A. and Strauss, J.V., 2020. Calibrating the coevolution of Ediacaran life and environment. Proceedings of the National Academy of Sciences, 117(29), pp.16824-16830.
Rooney, A.D., Macdonald, F.A., Strauss, J.V., Dudás, F.Ö., Hallmann, C. and Selby, D., 2014. Re-Os geochronology and coupled Os-Sr isotope constraints on the Sturtian snowball Earth. Proceedings of the National Academy of Sciences, 111(1), pp.51-56.
Rooney, A.D., Selby, D., Houzay, J.P. and Renne, P.R., 2010. Re–Os geochronology of a Mesoproterozoic sedimentary succession, Taoudeni basin, Mauritania: Implications for basin-wide correlations and Re–Os organic-rich sediments systematics. Earth and Planetary Science Letters, 289(3-4), pp.486-496.
Rooney, A.D., Strauss, J.V., Brandon, A.D. and Macdonald, F.A., 2015. A Cryogenian chronology: Two long-lasting synchronous Neoproterozoic glaciations. Geology, 43(5), pp.459-462.
Roscoe, S.M., 1969. Huronian rocks and uraniferous conglomerates (Vol. 68, No. 40). Department of Energy, Mines and Resources.
Sai, V.S., Khanna, T.C. and Reddy, N.R.K., 2016. Red beds in the Cuddapah Basin, eastern Dharwar craton, India: Implications for the initiation of sedimentation during the Proterozoic Oxygenation event. J. Ind. Geophys. Union (May 2016), 20(3), pp.342-350.
Saitoh, M., Nabhan, S., Thomazo, C., Olivier, N., Moyen, J.F., Ueno, Y. and Marin-Carbonne, J., 2020. Multiple Sulfur Isotope Records of the 3.22 Ga Moodies Group, Barberton Greenstone Belt. Geosciences, 10(4), p.145.
Salminen, J., Hanson, R., Evans, D.A., Gong, Z., Larson, T., Walker, O., Gumsley, A., Söderlund, U. and Ernst, R., 2018. Direct Mesoproterozoic connection of the Congo and Kalahari cratons in proto-Africa: Strange attractors across supercontinental cycles. Geology, 46(11), pp.1011-1014.
Samuelsson, J., Dawes, P.R. and Vidal, G., 1999. Organic-walled microfossils from the Proterozoic Thule Supergroup, northwest Greenland. Precambrian Research, 96(1-2), pp.1-23.
Sawada, H., Maruyama, S., Sakata, S. and Hirata, T., 2016. Detrital zircon geochronology by LA-ICP-MS of the Neoarchean Manjeri Formation in the Archean Zimbabwe craton–the disappearance of Eoarchean crust by 2.7 Ga?. Journal of African Earth Sciences, 113, pp.1-11.
Sawaki, Y., Moussavou, M., Sato, T., Suzuki, K., Ligna, C., Asanuma, H., Sakata, S., Obayashi, H., Hirata, T. and Edou-Minko, A., 2017. Chronological constraints on the Paleoproterozoic Francevillian Group in Gabon. Geoscience Frontiers, 8(2), pp.397-407.
Schidlowski, M., 1983. Evolution of photoautotrophy and early atmospheric oxygen levels. In Developments in Precambrian Geology (Vol. 7, pp. 211-227). Elsevier.
Schier, K., Bau, M., Muenker, C., Beukes, N. and Viehmann, S., 2018. Trace element and Nd isotope composition of shallow seawater prior to the Great Oxidation Event: Evidence from stromatolitic bioherms in the Paleoproterozoic Rooinekke and Nelani Formations, South Africa. Precambrian Research, 315, pp.92-102.
Schmidt, P.W. and Williams, G.E., 2011. Paleomagnetism of the Pandurra formation and Blue Range Beds, Gawler Craton, South Australia, and the Australian mesoproterozoic apparent polar wander path. Australian Journal of Earth Sciences, 58(4), pp.347-360.
Schneiderhan, E., Zimmermann, U., Gutzmer, J., Mezger, K. and Armstrong, R., 2011. Sedimentary provenance of the Neoarchean Ventersdorp Supergroup, southern Africa: shedding light on the evolution of the Kaapvaal craton during the Neoarchean. The Journal of Geology, 119(6), pp.575-596.
Schröder, S., Bedorf, D., Beukes, N.J. and Gutzmer, J., 2011. From BIF to red beds: Sedimentology and sequence stratigraphy of the Paleoproterozoic Koegas Subgroup (South Africa). Sedimentary Geology, 236(1-2), pp.25-44.
Schröder, S., Beukes, N.J. and Armstrong, R.A., 2016. Detrital zircon constraints on the tectonostratigraphy of the Paleoproterozoic Pretoria Group, South Africa. Precambrian Research, 278, pp.362-393.
Schwartz, M.O., Kwok, Y.Y., Davis, D.W. and Akanyang, P., 1996. Geology, geochronology and regional correlation of the Ghanzi Ridge, Botswana. South African Journal of Geology, 99(3), pp.245-250.
Sears, J.W., Chamberlain, K.R. and Buckley, S.N., 1998. Structural and U-Pb geochronological evidence for 1.47 Ga rifting in the Belt basin, western Montana. Canadian Journal of Earth Sciences, 35(4), pp.467-475.
Shang, M., Tang, D., Shi, X., Zhou, L., Zhou, X., Song, H. and Jiang, G., 2019. A pulse of oxygen increase in the early Mesoproterozoic ocean at ca. 1.57–1.56 Ga. Earth and Planetary Science Letters, 527, p.115797.
Sheen, A.I., Heaman, L.M., Kjarsgaard, B., Ootes, L., Pearson, D.G. and Creaser, R.A., 2019. Athapuscow aulacogen revisited: Geochronology and geochemistry of the 2046 Ma Union Island Group mafic magmatism, East Arm of Great Slave Lake, Northwest Territories, Canada. Precambrian Research, 321, pp.85-102.
Silver, L.T., 1978, Precambrian formations and Precambrian history in Cochise County, southeastern Arizona: N e w Mexico Geological Society Field Conference Guidebook, v. 29, p. 1 5 7 - 1 6 3
Simpson, P.R. and Bowles, J.F.W., 1977. Uranium mineralization of the Witwatersrand and Dominion Reef systems. Philosophical Transactions of the Royal Society of London. Series A, Mathematical and Physical Sciences, 286(1336), pp.527-548.
Sreenivas, B., Dey, S., Rao, Y.B., Kumar, T.V., Babu, E.V.S.S.K. and Williams, I.S., 2019. A new cache of Eoarchaean detrital zircons from the Singhbhum craton, eastern India and constraints on early Earth geodynamics. Geoscience Frontiers, 10(4), pp.1359-1370.
Srinivasan, R. and Ojakangas, R.W., 1986. Sedimentology of quartz-pebble conglomerates and quartzites of the Archean Bababudan Group, Dharwar Craton, South India: evidence for early crustal stability. The Journal of Geology, 94(2), pp.199-214.
Stauffer, M.R., 1974. Geology of the Flin Flon area: A new look at the Sunless City. Geoscience Canada.
Steadman, J.A., Large, R.R., Meffre, S., Olin, P.H., Danyushevsky, L.V., Gregory, D.D., Belousov, I., Lounejeva, E., Ireland, T.R. and Holden, P., 2015. Synsedimentary to early diagenetic gold in black shale-hosted pyrite nodules at the Golden Mile Deposit, Kalgoorlie, Western Australia. Economic Geology, 110(5), pp.1157-1191.
Stewart, J.H., Gehrels, G.E., Barth, A.P., Link, P.K., Christie-Blick, N. and Wrucke, C.T., 2001. Detrital zircon provenance of Mesoproterozoic to Cambrian arenites in the western United States and northwestern Mexico. Geological Society of America Bulletin, 113(10), pp.1343-1356.
Strauss, J.V., Rooney, A.D., Macdonald, F.A., Brandon, A.D. and Knoll, A.H., 2014. 740 Ma vase-shaped microfossils from Yukon, Canada: Implications for Neoproterozoic chronology and biostratigraphy. Geology, 42(8), pp.659-662.
Su, W., Li, H., Huff, W.D., Ettensohn, F.R., Zhang, S., Zhou, H. and Wan, Y., 2010. SHRIMP U-Pb dating for a K-bentonite bed in the Tieling Formation, North China. Chinese Science Bulletin, 55(29), pp.3312-3323.
Sumner, D.Y. and Bowring, S.A., 1996. U-Pb geochronologic constraints on deposition of the Campbellrand Subgroup, Transvaal Supergroup, South Africa. Precambrian Research, 79(1-2), pp.25-35.
Suominen, V., 1991. The chronostratigraphy of southwestern Finland with special reference to Postjotnian and Subjotnian diabases. Bulletin-Geological Survey of Finland, (356).
Tassinari, C.C.G., Jost, H., Santos, J.C., Nutman, A.P. and Bennell, M.R., 2006. Pb and Nd isotope signatures and SHRIMP U–Pb geochronological evidence of Paleoproterozoic age for Mina III gold mineralization, Crixás District, Central Brazil. In 5th South American Symposium on Isotope Geology, Punta Del Este, Uruguay, Short Papers Volume (pp. 527-529).
Teles, G., Chemale Jr, F. and de Oliveira, C.G., 2015. Paleoarchean record of the detrital pyrite-bearing, Jacobina Au–U deposits, Bahia, Brazil. Precambrian Research, 256, pp.289-313.
Thomazo, C., Nisbet, E.G., Grassineau, N.V., Peters, M. and Strauss, H., 2013. Multiple sulfur and carbon isotope composition of sediments from the Belingwe Greenstone Belt (Zimbabwe): A biogenic methane regulation on mass independent fractionation of sulfur during the Neoarchean?. Geochimica et Cosmochimica Acta, 121, pp.120-138.
Thorpe, R.I., Hickman, A.H., Davis, D.W., Mortensen, J.K., Trendall A.F., 1992. Constraints to models for Archean lead evolution from precise zircon U-Pb geochronology for the Marble Bar region, Pilbara Craton, Western Australia in J.E. Glover, S.E. Ho (Eds.), The Archaean: Terrains, Processes and Metallogeny, vol. 22, Geol. Dept. and Univ. Ext., The Univ. of W. Austr. Publ. (1992), pp. 395-406
Thurston, P.C., Ayer, J.A., Goutier, J. and Hamilton, M.A., 2008. Depositional gaps in Abitibi greenstone belt stratigraphy: A key to exploration for syngenetic mineralization. Economic Geology, 103(6), pp.1097-1134.
Trendall, A.F., Basei, M.A.S., De Laeter, J.R. and Nelson, D.R., 1998. SHRIMP zircon U–Pb constraints on the age of the Carajás formation, Grão ParáGroup, Amazon Craton. Journal of South American Earth Sciences, 11(3), pp.265-277.
Trendall, A.F., Compston, W., Nelson, D.R., De Laeter, J.R. and Bennett, V.C., 2004. SHRIMP zircon ages constraining the depositional chronology of the Hamersley Group, Western Australia. Australian Journal of Earth Sciences, 51(5), pp.621-644.
Tripp, G.I., 2013. Stratigraphy and structure in the Neoarchaean of the Kalgoorlie district, Australia: critical controls on greenstone-hosted gold deposits (PhD Thesis, James Cook University).
Turek, A., Smith, P.E. and Schmus, W.V., 1982. Rb–Sr and U–Pb ages of volcanism and granite emplacement in the Michipicoten belt—Wawa, Ontario. Canadian Journal of Earth Sciences, 19(8), pp.1608-1626.
Turnbull, M.J., Whitehouse, M.J. and Moorbath, S., 1996. New isotopic age determinations for the Torridonian, NW Scotland. Journal of the Geological Society, 153(6), pp.955-964.
Vallini, D.A., Cannon, W.F. and Schulz, K.J., 2006. Age constraints for Paleoproterozoic glaciation in the Lake Superior Region: detrital zircon and hydrothermal xenotime ages for the Chocolay Group, Marquette Range Supergroup. Canadian Journal of Earth Sciences, 43(5), pp.571-591.
Van Acken, D., Thomson, D., Rainbird, R.H. and Creaser, R.A., 2013. Constraining the depositional history of the Neoproterozoic Shaler Supergroup, Amundsen Basin, NW Canada: Rhenium-osmium dating of black shales from the Wynniatt and Boot Inlet Formations. Precambrian Research, 236, pp.124-131.
Van Breemen, O., Kjarsgaard, B.A., Tella, S., Lemkow, D., Aspler, L., 2013. U–Pb detrital zircon geochronology of clastic sedimentary rocks of the Paleoproterozoic Nonacho and East Arm basins, East Arm MERA study area, Chapter 4. In: Wright, D.F., Ambrose, E.J., Lemkow, D., and Bonham-Carter, G. (Eds.), Mineral and energy resource assessment of the proposed Thaidene Nene National Park Reserve in …
Van Kranendonk, M.J., Hugh Smithies, R., Hickman, A.H. and Champion, D.C., 2007. secular tectonic evolution of Archean continental crust: interplay between horizontal and vertical processes in the formation of the Pilbara Craton, Australia. Terra Nova, 19(1), pp.1-38.
Van Kranendonk, M.J., Philippot, P., Lepot, K., Bodorkos, S. and Pirajno, F., 2008. Geological setting of Earth's oldest fossils in the ca. 3.5 Ga Dresser formation, Pilbara Craton, Western Australia. Precambrian Research, 167(1-2), pp.93-124.
Villaca, J.N. and Moura, L.A.M., 1981. Uranium in Precambrian Moeda Formation, Minas Gerais, Brazil (No. USGS-PP--1161-A-BB).
Wallace, M.W., vS Hood, A., Woon, E.M., Giddings, J.A. and Fromhold, T.A., 2015. The Cryogenian Balcanoona reef complexes of the Northern Flinders Ranges: implications for Neoproterozoic ocean chemistry. Palaeogeography, Palaeoclimatology, Palaeoecology, 417, pp.320-336.
Walraven, F., Martini, J.F., 1995. Zircon Pb-evaporation age determinations of the oak tree formation, Chuniespoort group, Transvaal sequence: implications for Transvaal-Griqualand west basin correlations. South African Journal of Geology, 98(1), pp.58-67.
Warke, M.R., Di Rocco, T., Zerkle, A.L., Lepland, A., Prave, A.R., Martin, A.P., Ueno, Y., Condon, D.J. and Claire, M.W., 2020. The great oxidation event preceded a paleoproterozoic “snowball Earth”. Proceedings of the National Academy of Sciences, 117(24), pp.13314-13320.
Wei, B., Tang, D., Shi, X., Lechte, M., Zhou, L., Zhou, X. and Song, H., 2021. A pulsed oxygenation in terminal Paleoproterozoic ocean: Evidence from the transition between the Chuanlinggou and Tuanshanzi formations, North China. Geochemistry, Geophysics, Geosystems, 22(5), p.e2020GC009612.
Wendorff, M., 2005. Evolution of Neoproterozoic–Lower Palaeozoic Lufilian arc, Central Africa: a new model based on syntectonic conglomerates. Journal of the Geological Society, 162(1), pp.5-8.
Wendorff, M., 2011. Tectonosedimentary expressions of the evolution of the Fungurume foreland basin in the Lufilian Arc, Neoproterozoic–Lower Palaeozoic, Central Africa. Geological Society, London, Special Publications, 357(1), pp.69-83.
Wilson, A.H. and Zeh, A., 2018. U-Pb and Hf isotopes of detrital zircons from the Pongola Supergroup: Constraints on deposition ages, provenance and Archean evolution of the Kaapvaal craton. Precambrian Research, 305, pp.177-196.
Wilson, J.F., Nesbitt, R.W. and Fanning, C.M., 1995. Zircon geochronology of Archaean felsic sequences in the Zimbabwe craton: a revision of greenstone stratigraphy and a model for crustal growth. Geological Society, London, Special Publications, 95(1), pp.109-126.
Wilson, J.P., Fischer, W.W., Johnston, D.T., Knoll, A.H., Grotzinger, J.P., Walter, M.R., McNaughton, N.J., Simon, M., Abelson, J., Schrag, D.P. and Summons, R., 2010. Geobiology of the late Paleoproterozoic Duck Creek Formation, Western Australia. Precambrian Research, 179(1-4), pp.135-149.
Wingate, M.T.D., 1999. Ion microprobe baddeleyite and zircon ages for Late Archaean mafic dykes of the Pilbara Craton, Western Australia. Australian Journal of Earth Sciences, 46(4), pp.493-500.
Witkosky, R. and Wernicke, B.P., 2018. Subsidence history of the Ediacaran Johnnie Formation and related strata of southwest Laurentia: Implications for the age and duration of the Shuram isotopic excursion and animal evolution. Geosphere, 14(5), pp.2245-2276.
Wörndle, S., Crockford, P.W., Kunzmann, M., Bui, T.H. and Halverson, G.P., 2019. Linking the Bitter Springs carbon isotope anomaly and early Neoproterozoic oxygenation through I/[Ca+ Mg] ratios. Chemical Geology, 524, pp.119-135.
Yang, G., Hannah, J.L., Zimmerman, A., Stein, H.J. and Bekker, A., 2009. Re–Os depositional age for Archean carbonaceous slates from the southwestern Superior Province: challenges and insights. Earth and Planetary Science Letters, 280(1-4), pp.83-92.
Yang, W. and Holland, H.D., 2003. The Hekpoort paleosol profile in Strata 1 at Gaborone, Botswana: soil formation during the Great Oxidation Event. American Journal of Science, 303(3), pp.187-220.
Zhang, S., Li, Z.X., Evans, D.A., Wu, H., Li, H. and Dong, J., 2012. Pre-Rodinia supercontinent Nuna shaping up: A global synthesis with new paleomagnetic results from North China. Earth and Planetary Science Letters, 353, pp.145-155.
Zhang, S., Wang, X., Hammarlund, E.U., Wang, H., Costa, M.M., Bjerrum, C.J., Connelly, J.N., Zhang, B., Bian, L. and Canfield, D.E., 2015. Orbital forcing of climate 1.4 billion years ago. Proceedings of the National Academy of Sciences, 112(12), pp.E1406-E1413.
Zhao, X.F., Zhou, M.F., Li, J.W., Sun, M., Gao, J.F., Sun, W.H. and Yang, J.H., 2010. Late Paleoproterozoic to early Mesoproterozoic Dongchuan Group in Yunnan, SW China: implications for tectonic evolution of the Yangtze Block. Precambrian Research, 182(1-2), pp.57-69.
Zhelezinskaia, I., Kaufman, A.J., Farquhar, J. and Cliff, J., 2014. Large sulfur isotope fractionations associated with Neoarchean microbial sulfate reduction. Science, 346(6210), pp.742-744.
Zhou, M., Luo, T., Huff, W.D., Yang, Z., Zhou, G., Gan, T., Yang, H. and Zhang, D., 2018. Timing the termination of the Doushantuo negative carbon isotope excursion: evidence from U-Pb ages from the Dengying and Liuchapo formations, South China. Science Bulletin, 63(21), pp.1431-1438.
Zwanzig, H.V., 2000. Structure and stratigraphy of the south flank of the Kisseynew Domain in the Trans-Hudson Orogen, Manitoba: implications for 1.845-1.77 Ga collision tectonics. Canadian Journal of Earth Sciences, 36(11), pp.1859-1880.

## Sheet: G49385
Hodgskiss, M.S.W., and Sperling, E.A., 2021, A prolonged, two-step oxygenation of Earth’s early atmosphere: Support from confidence intervals: Geology, https://doi.org/10.1130/G49385.1
